# Supplementary material for: Molecular structural requirements, dye specificity, and application of anionic peptide amphiphiles that induce intense fluorescence in cationic dyes
Source: Royal Society of Chemistry journal article supplement (doi:10.1039/b818206j), 2009-01-01
Supplement: b818206j-a.pdf [file b818206j-a.pdf]

## Electronic Supplementary Informations

### Molecular structural requirements, dye specificity, and application of anionic peptide amphiphiles that induce intense fluorescence in cationic dyes

#### Amphiphile preparation

#### Anionic amphiphiles derived from acidic $\alpha$ -amino acids (L-Glu and L-2-aminoadipic acid)

***N',N''*-Bis(dodecylaminocarbonylethyl)-*N* <sup>$\alpha$</sup> -[(4-carboxy)butanoyl]-L-glutamide (1).** 1-Aminododecane (3.01 g, 16.2 mmol), *N*-benzyloxycarbonyl- $\beta$ -alanine ( $\beta$ -Ala-Z) (3.97 g, 17.8 mmol), and triethylamine (3.77 g, 37.2 mmol) were dissolved in 100 cm<sup>3</sup> of tetrahydrofuran (THF) and stirred with cooling to 0 °C. Diethylphosphoryl cyanide (DEPC) (3.43 g, 21.0 mmol) was added to the solution and stirred in an ice bath for 30 min. After being stirred for 1 day at room temperature, the solution was concentrated *in vacuo*. The residue was dissolved in 200 cm<sup>3</sup> of chloroform and was washed with 5 wt% aqueous NaHCO<sub>3</sub> (200 cm<sup>3</sup>, in twice), deionized water (20 cm<sup>3</sup>, once), 0.3 N HCl (200 cm<sup>3</sup>, in twice), and deionized water (20 cm<sup>3</sup>, once). The solution was dried over Na<sub>2</sub>SO<sub>4</sub>. After filtration, the filtrate was concentrated *in vacuo* and recrystallized from methanol to give white solid *N*-dodecyl-3-(*N'*-benzyloxycarbonyl)aminopropanamide (**17**): yield 5.76 g (91.1 %); m.p. 124-125 °C; FT-IR (KBr): /cm<sup>-1</sup> 3336, 3296, 2958, 2920, 2876, 2854, 1686, 1638, 1541, 1468, 1456, 1379, 733 and 694; <sup>1</sup>H-NMR (CDCl<sub>3</sub>):  $\delta$  0.80-0.96 (t, 3H, CH<sub>3</sub>), 1.17-1.38 (m, 18H, CH<sub>3</sub>(CH<sub>2</sub>)<sub>9</sub>), 1.38-1.59 (m, 2H, CH<sub>3</sub>(CH<sub>2</sub>)<sub>9</sub>CH<sub>2</sub>), 2.32-2.43 (m, 2H, C(=O)CH<sub>2</sub>), 3.14-3.26 (m, 2H, CH<sub>3</sub>(CH<sub>2</sub>)<sub>10</sub>CH<sub>2</sub>), 3.41-3.52 (m, 2H, CH<sub>2</sub>NHC(=O)O), 5.01-5.16 (s, 2H, CH<sub>2</sub>C<sub>6</sub>H<sub>5</sub>), 5.43-5.60 (m, 1H, NH), 5.60-5.76 (m, 1H, NH), 7.29-7.40 (m, 5H, C<sub>6</sub>H<sub>5</sub>); (Found: C, 70.42; H, 9.81; N, 7.16. Calc. for C<sub>23</sub>H<sub>38</sub>N<sub>2</sub>O<sub>3</sub>·0.9H<sub>2</sub>O: C, 70.42; H, 9.81; N, 7.14 %). **17** (5.50 g, 14.1 mmol) was dissolved in 200 cm<sup>3</sup> of ethanol with heating and Pd black (1 g) was added to the solution. H<sub>2</sub> gas was bubbled slowly into the solution

for 6 hours. After confirming the removal of the benzyloxycarbonyl group (*Z*-group) by FTIR measurement, Pd black was removed by filtration. The filtrate was concentrated and dried *in vacuo* to give white waxy solid *N*-dodecyl-3-aminopropanamide (**18**): yield 3.61 g (100 %); m.p. 84.0-85.5 °C; FT-IR (KBr): /cm<sup>-1</sup> 3298, 2958, 2928, 2854, 1647, 1555, 1468, 1375 and 721; <sup>1</sup>H-NMR (CDCl<sub>3</sub>): δ 0.72-0.95 (t, 3H, CH<sub>3</sub>), 1.12-1.40 (m, 18H, CH<sub>3</sub>(CH<sub>2</sub>)<sub>9</sub>), 1.40-1.77 (m, 2H, CH<sub>3</sub>(CH<sub>2</sub>)<sub>9</sub>CH<sub>2</sub>), 1.77-1.87 (m, 2H, NH<sub>2</sub>), 2.27-2.35 (m, 2H, C(=O)CH<sub>2</sub>), 2.97-3.07 (m, 2H, CH<sub>2</sub>NH<sub>2</sub>), 3.17-3.30 (m, 2H, CH<sub>2</sub>NH), 6.90-7.10 (m, 1H, NH); (Found: C, 68.11; H, 12.29; N, 10.89. Calc. for C<sub>15</sub>H<sub>32</sub>N<sub>2</sub>O: C, 72.26; H, 12.58; N, 10.92 %). **18** (3.21 g, 12.5 mmol), *N*-benzyloxycarbonyl-L-glutamic acid (L-Glu-*Z*) (1.60 g, 5.69 mmol), and triethylamine (2.60 g, 25.7 mmol) were dissolved in 150 cm<sup>3</sup> of THF and stirred with cooling to 0 °C. DEPC (2.32 g, 14.2 mmol) was added to the mixture and stirred for 30 min in an ice bath. After being stirred for 1 day at room temperature, the solution was concentrated *in vacuo* and the residue was recrystallized from methanol to give white solid *N',N''*-bis(dodecylaminocarbonylethyl)-*N*<sup>α</sup>-benzyloxycarbonyl-L-glutamide (**19**): yield 3.26 g (75.6 %); m.p. 213-216 °C; FT-IR (KBr): /cm<sup>-1</sup> 3298, 2960, 2924, 2856, 1692, 1657, 1640, 1547, 1468, 1456, 1375, 721 and 696; <sup>1</sup>H-NMR (CDCl<sub>3</sub>): δ 0.79-0.97 (m, 6H, CH<sub>3</sub> × 2), 1.00-1.41 (m, 36H, CH<sub>3</sub>(CH<sub>2</sub>)<sub>9</sub> × 2), 1.41-1.57 (m, 6H, CH<sub>3</sub>(CH<sub>2</sub>)<sub>9</sub>CH<sub>2</sub> × 2, \*CHCH<sub>2</sub>), 2.15-2.47 (m, 6H, C(=O)CH<sub>2</sub> × 3), 2.98-3.13 (q, 4H, CH<sub>3</sub>(CH<sub>2</sub>)<sub>10</sub>CH<sub>2</sub> × 2), 3.13-3.28 (m, 4H, C(=O)CH<sub>2</sub>CH<sub>2</sub>NH × 2), 4.07-4.27 (m, 1H, \*CH), 5.02-5.14 (s, 2H, CH<sub>2</sub>C<sub>6</sub>H<sub>5</sub>), 5.87-6.10 (m, 2H, NH × 2), 6.50-6.70 (m, 1H, NH), 6.70-6.90 (m, 1H, NH), 6.96-7.10 (m, 1H, NH), 7.30-7.44 (m, 5H, C<sub>6</sub>H<sub>5</sub>); (Found: C, 66.97; H, 10.28; N, 9.00. Calc. for C<sub>43</sub>H<sub>75</sub>N<sub>5</sub>O<sub>6</sub>·0.7H<sub>2</sub>O: C, 66.97; H, 9.99; N, 9.08 %). **19** (3.10 g, 4.09 mmol) was dissolved in 200 cm<sup>3</sup> of *N,N*-dimethylformamide (DMF) with heating and Pd black (1 g) was added to the solution. H<sub>2</sub> gas was bubbled slowly into the solution for 6 hours. After confirming the removal of *Z*-group by FTIR measurement, Pd black was removed by filtration. The filtrate was concentrated and dried *in vacuo* to give white solid *N',N''*-bis(dodecylaminocarbonylethyl)-L-glutamide (**20**): yield 2.55 g (100 %); m.p. 172-

175 °C; FT-IR (KBr): /cm<sup>-1</sup> 3298, 2960, 2920, 2854, 1638, 1547, 1468, 1379 and 721; <sup>1</sup>H-NMR (CDCl<sub>3</sub>): δ 0.83-0.93 (t, 6H, CH<sub>3</sub> × 2), 1.13-1.37 (m, 36H, CH<sub>3</sub>(CH<sub>2</sub>)<sub>9</sub> × 2), 1.43-1.57 (m, 4H, CH<sub>3</sub>(CH<sub>2</sub>)<sub>9</sub>CH<sub>2</sub> × 2), 1.57-1.80 (m, 2H, NH<sub>2</sub>), 1.87-2.01 (m, 2H, \*CHCH<sub>2</sub>), 2.17-2.28 (m, 2H, \*CHCH<sub>2</sub>CH<sub>2</sub>), 2.37-2.46 (m, 4H, C(=O)CH<sub>2</sub>CH<sub>2</sub>NH × 2), 3.16-3.29 (m, 4H, CH<sub>3</sub>(CH<sub>2</sub>)<sub>10</sub>CH<sub>2</sub> × 2), 3.46-3.60 (m, 4H, C(=O)CH<sub>2</sub>CH<sub>2</sub>NH × 2), 6.09-6.33 (m, 1H, NH), 7.70-7.83 (m, 1H, NH); (Found: C, 67.33; H, 11.01; N, 11.01. Calc. for C<sub>35</sub>H<sub>69</sub>N<sub>5</sub>O<sub>4</sub>·0.7H<sub>2</sub>O: C, 67.33; H, 11.15; N, 10.22 %). **20** (0.80 g, 1.3 mmol) was dissolved in 80 cm<sup>3</sup> of DMF. Glutaric anhydride (0.18 g, 1.5 mmol) and triethylamine (0.13 g, 1.3 mmol) were added to the solution and stirred in an ice bath. After being stirred for 1 day at room temperature, the solution was concentrated *in vacuo*. The residue was recrystallized from methanol and dried *in vacuo* to give a white solid (**1**): yield 0.65 g (69 %); m.p. 205-210 °C; FT-IR (KBr): /cm<sup>-1</sup> 3296, 2960, 2924, 2856, 1709, 1638, 1549, 1468, 1456, 1377 and 721; <sup>1</sup>H-NMR (CDCl<sub>3</sub>): δ 0.79-0.95 (t, 6H, CH<sub>3</sub> × 2), 1.03-1.38 (m, 36H, CH<sub>3</sub>(CH<sub>2</sub>)<sub>9</sub> × 2), 1.42-1.53 (m, 4H, CH<sub>3</sub>(CH<sub>2</sub>)<sub>9</sub>CH<sub>2</sub> × 2), 1.59-2.11 (m, 4H, \*CHCH<sub>2</sub>, CH<sub>2</sub>CH<sub>2</sub>(C=O)O), 2.37-2.62 (m, 10H, (C=O)CH<sub>2</sub> × 5), 3.08-3.28 (m, 4H, CH<sub>3</sub>(CH<sub>2</sub>)<sub>10</sub>CH<sub>2</sub> × 2), 3.38-3.63 (m, 4H, (C=O)CH<sub>2</sub>CH<sub>2</sub>NH × 2); (Found: C, 63.98; H, 10.11; N, 9.81. Calc. for C<sub>40</sub>H<sub>75</sub>N<sub>5</sub>O<sub>7</sub>·0.7H<sub>2</sub>O: C, 63.98; H, 10.26; N, 9.33 %).

***N,N'*-Bis(dodecylaminocarbonylethyl)-*N*<sup>α</sup>-[(3-carboxy)propanoyl]-L-glutamide**

**(2)**. **2** was prepared as described above using succinic anhydride instead of glutaric anhydride: yield 1.10 g (72.8 %); m.p. 199.5-200.5 °C; FT-IR (KBr): /cm<sup>-1</sup> 3300, 2960, 2924, 2856, 1719, 1638, 1551, 1468 and 721; <sup>1</sup>H-NMR (CDCl<sub>3</sub>): δ 0.79-0.94 (m, 6H, CH<sub>3</sub> × 2), 1.13-1.42 (m, 36H, CH<sub>3</sub>(CH<sub>2</sub>)<sub>9</sub> × 2), 1.42-1.92 (m, 6H, CH<sub>3</sub>(CH<sub>2</sub>)<sub>9</sub>CH<sub>2</sub> × 2, \*CHCH<sub>2</sub>), 2.35-2.60 (m, 10H, C(=O)CH<sub>2</sub> × 5), 3.12-3.30 (m, 4H, CH<sub>3</sub>(CH<sub>2</sub>)<sub>10</sub>CH<sub>2</sub> × 2), 3.43-3.66 (m, 4H, C(=O)CH<sub>2</sub>CH<sub>2</sub>NH × 2), 4.09-4.23 (m, 1H, \*CH), 6.95-7.03 (m, 1H, NH), 7.49-7.55 (m, 1H, NH), 7.95-8.08 (m, 2H, NH × 2); (Found: C, 64.17; H, 10.90; N, 9.68. Calc. for C<sub>39</sub>H<sub>73</sub>N<sub>5</sub>O<sub>7</sub>·0.7H<sub>2</sub>O: C, 64.17; H, 10.17; N, 9.59 %).

***N',N'*-Didodecyl-L-2-*N*<sup>α</sup>-(4-carboxy)butanoyl]aminoadipamide (3).** L-2-aminoadipic acid (1.00 g, 6.21 mmol) and sodium hydroxide (0.898 g, 22.5 mmol) were dissolved in 50 cm<sup>3</sup> of deionized water with cooling in an ice bath. Benzyl chloroformate (Z-Cl) (1.60 g, 9.31 mmol) was added dropwise to the solution and the solution was stirred vigorously for 2 hours in an ice bath. The solution was washed with 50 cm<sup>3</sup> of diethylether to remove excess Z-Cl. The pH of aqueous layer was lowered to 2 to give turbid solution. The solution was stored in refrigerator. The solid precipitated was filtered and collected to obtain white powder *N*-benzyloxycarbonyl-L-2-aminoadipic acid (**21**): yield 1.58 g (86.3 %); m.p. 138 °C; FT-IR (KBr): /cm<sup>-1</sup> 3326, 1711, 1698, 1537, 1462 and 698; (Found: C, 56.95; H, 6.50; N, 4.71. Calc. for C<sub>14</sub>H<sub>17</sub>NO<sub>6</sub>: C, 56.95; H, 5.80; N, 4.74 %). 1-Aminododecane (1.04 g, 5.59 mmol), **21** (0.750 g, 2.54 mmol), and triethylamine (1.16 g, 11.4 mmol) were dissolved in 100 cm<sup>3</sup> of THF and stirred with cooling to 0 °C. DEPC (1.05 g, 6.44 mmol) was added to the mixture and stirred for 30 min in an ice bath. After being stirred for 1 day at room temperature, the solution was concentrated *in vacuo* and the residue was dissolved in 250 cm<sup>3</sup> of chloroform. The solution was washed with 5 wt% aqueous NaHCO<sub>3</sub> (200 cm<sup>3</sup>, in twice), deionized water (20 cm<sup>3</sup>, once), 0.3 N HCl (200 cm<sup>3</sup>, in twice), and deionized water (20 cm<sup>3</sup>, once). The solution was dried over Na<sub>2</sub>SO<sub>4</sub>. After filtration, the filtrate was concentrated *in vacuo* and recrystallized from methanol to give white solid *N',N'*-didodecyl-L-2-*N*<sup>α</sup>-(benzyloxycarbonyl)aminoadipamide (**22**): yield 0.626 g (39.1 %); m.p. 156-158 °C; FT-IR (KBr): /cm<sup>-1</sup> 3298, 2958, 2922, 2854, 1684, 1653, 1545, 1468, 721 and 696; <sup>1</sup>H-NMR (CDCl<sub>3</sub>): δ 0.72-1.00 (m, 6H, CH<sub>3</sub> × 2), 1.00-1.60 (m, 42H, CH<sub>3</sub>(CH<sub>2</sub>)<sub>10</sub> × 2, \*CHCH<sub>2</sub>CH<sub>2</sub>), 1.66-1.87 (m, 2H, \*CHCH<sub>2</sub>), 2.10-2.52 (m, 2H, C(=O)CH<sub>2</sub>), 3.02-3.38 (m, 4H, CH<sub>2</sub>NH × 2), 3.91-4.25 (m, 1H, \*CH), 4.95-5.15 (s, 2H, CH<sub>2</sub>C<sub>6</sub>H<sub>5</sub>), 5.60-5.89 (m, 2H, NH × 2), 6.48-6.80 (m, 1H, NH), 7.23-7.49 (m, 5H, C<sub>6</sub>H<sub>5</sub>); (Found: C, 72.21; H, 10.67; N, 6.64. Calc. for C<sub>38</sub>H<sub>67</sub>N<sub>3</sub>O<sub>4</sub>·0.1H<sub>2</sub>O: C, 72.21; H, 10.72; N, 6.65 %). **22** (0.576 g, 0.914 mmol) was dissolved in 200 cm<sup>3</sup> of ethanol with heating and Pd black (1 g) was added to the solution. H<sub>2</sub> gas was bubbled slowly into the solution for 6

hours. After confirming the removal of Z-group by FTIR measurement, Pd black was removed by filtration. The filtrate was concentrated *in vacuo* to give white solid *N',N''*-didodecyl-L-2-aminoadipamide (**23**): yield 0.426 g (94.0 %); m.p. 97-104 °C; FT-IR (KBr): /cm<sup>-1</sup> 3308, 2960, 2922, 2854, 1636, 1543, 1470, 1376 and 721; <sup>1</sup>H-NMR (CDCl<sub>3</sub>): δ 0.70-0.98 (m, 6H, CH<sub>3</sub> × 2), 1.07-1.61 (m, 42H, CH<sub>3</sub>(CH<sub>2</sub>)<sub>10</sub> × 2, \*CHCH<sub>2</sub>CH<sub>2</sub>), 1.87-2.17 (m, 2H, \*CHCH<sub>2</sub>), 2.25-2.50 (m, 2H, C(=O)CH<sub>2</sub>), 2.50-2.81 (m, 2H, NH<sub>2</sub>), 3.01-3.50 (m, 4H, CH<sub>2</sub>NH × 2), 3.87-4.16 (m, 1H, \*CH), 6.32-6.73 (m, 1H, NH), 6.73-6.92 (m, 1H, NH); (Found: C, 71.31; H, 12.10; N, 7.94. Calc. for C<sub>30</sub>H<sub>61</sub>N<sub>3</sub>O<sub>2</sub>·0.6H<sub>2</sub>O: C, 71.31; H, 12.38; N, 8.32 %). **23** (0.381 g, 0.768 mmol) was dissolved in 80 cm<sup>3</sup> of THF. Glutaric anhydride (0.132 g, 1.15 mmol) and triethylamine (0.160 g, 1.54 mmol) were added to the solution and stirred in an ice bath. After being stirred for 1 day at room temperature, the solution was concentrated *in vacuo*. The residue was recrystallized from methanol and dried *in vacuo* to give a white solid (**3**): yield 0.373 g (76.3 %); m.p. 147-153 °C; FT-IR (KBr): /cm<sup>-1</sup> 3296, 2958, 2922, 2854, 1705, 1640, 1547, 1466, 1379 and 721; <sup>1</sup>H-NMR (CDCl<sub>3</sub>): δ 0.75-1.01 (m, 6H, CH<sub>3</sub> × 2), 1.01-1.61 (m, 36H, CH<sub>3</sub>(CH<sub>2</sub>)<sub>9</sub> × 2), 1.61-1.90 (m, 10H, CH<sub>3</sub>(CH<sub>2</sub>)<sub>9</sub>CH<sub>2</sub> × 2, \*CHCH<sub>2</sub>CH<sub>2</sub>, CH<sub>2</sub>CH<sub>2</sub>C(=O)O), 1.90-2.11 (m, 2H, \*CHCH<sub>2</sub>), 2.11-2.58 (m, 6H, C(=O)CH<sub>2</sub> × 3), 3.00-3.40 (m, 4H, CH<sub>2</sub>NH × 2), 4.32-4.59 (m, 1H, \*CH), 6.17-6.39 (m, 1H, NH), 7.37-8.23 (m, 2H, NH × 2); (Found: C, 67.85; H, 10.87; N, 7.18. Calc. for C<sub>35</sub>H<sub>67</sub>N<sub>3</sub>O<sub>5</sub>·0.7H<sub>2</sub>O: C, 67.85; H, 10.37; N, 6.60 %).

***N',N''*-Bis(dodecylaminocarbonylpropyl)-*N*<sup>α</sup>-[(4-carboxy)butanoyl]-L-glutamide (**5**)**. **5** was prepared as described above using γ-aminobutyric acid (GABA) instead of β-Ala. *N*-benzyloxycarbonyl-γ-aminobutyric acid (GABA-Z) (**24**) was prepared according to the method for **21**: yield 10.05 g (87.4 %); m.p. 64-65 °C; FT-IR (KBr): /cm<sup>-1</sup> 3334, 3064, 2964, 2924, 1690, 1549, 1454, 1274, 723 and 698; <sup>1</sup>H-NMR (CDCl<sub>3</sub>): δ 1.75-1.89 (m, 2H, C(=O)CH<sub>2</sub>CH<sub>2</sub>), 2.32-2.45 (t, 2H, C(=O)CH<sub>2</sub>), 3.16-3.30 (q, 2H, CH<sub>2</sub>NH), 4.91-5.04 (s, 1H, NH), 5.04-5.18 (m, 2H, CH<sub>2</sub>C<sub>6</sub>H<sub>5</sub>), 7.28-7.41 (m, 5H, C<sub>6</sub>H<sub>5</sub>), 9.90 (br, 1H, OH). *N*-Dodecyl-4-(*N'*-benzyloxycarbonyl)aminobutanamide (**25**): yield 4.46 g (81.7 %); m.p. 112

°C; FT-IR (KBr): /cm<sup>-1</sup> 3344, 3308, 2960, 2920, 2854, 1688, 1634, 1543, 1468, 1456, 1381, 733 and 694; <sup>1</sup>H-NMR (CDCl<sub>3</sub>): δ 0.85-0.92 (t, 3H, CH<sub>3</sub>), 1.19-3.36 (m, 18H, CH<sub>3</sub>(CH<sub>2</sub>)<sub>9</sub>), 1.43-1.53 (m, 2H, CH<sub>3</sub>(CH<sub>2</sub>)<sub>9</sub>CH<sub>2</sub>), 1.78-1.88 (m, 2H, C(=O)CH<sub>2</sub>CH<sub>2</sub>), 2.15-2.23 (t, 2H, C(=O)CH<sub>2</sub>), 3.16-3.29 (m, 4H, CH<sub>2</sub>NH × 2), 5.06-5.12 (s, 2H, CH<sub>2</sub>C<sub>6</sub>H<sub>5</sub>), 5.12-5.20 (s, 1H, NH), 5.94-6.01 (t, 1H, NH), 7.28-7.38 (m, 5H, C<sub>6</sub>H<sub>5</sub>); (Found: C, 68.49; H, 9.61; N, 6.45. Calc. for C<sub>24</sub>H<sub>40</sub>N<sub>2</sub>O<sub>3</sub>·0.9H<sub>2</sub>O: C, 68.49; H, 10.01; N, 6.66 %). *N*-Dodecyl-4-aminobutanamide (**26**): yield 2.90 g (100 %); m.p. 74-83 °C; FT-IR (KBr): /cm<sup>-1</sup> 3302, 2960, 2920, 2854, 1636, 1551, 1470, 1379 and 721; <sup>1</sup>H-NMR (CDCl<sub>3</sub>): δ 0.84-0.94 (t, 3H, CH<sub>3</sub>), 1.17-1.36 (m, 18H, CH<sub>3</sub>(CH<sub>2</sub>)<sub>9</sub>), 1.43-1.56 (m, 2H, CH<sub>3</sub>(CH<sub>2</sub>)<sub>9</sub>CH<sub>2</sub>), 1.71-1.91 (m, 4H, CH<sub>2</sub>CH<sub>2</sub>NH<sub>2</sub>), 2.18-2.33 (t, 2H, C(=O)CH<sub>2</sub>), 2.71-2.81 (t, 2H, CH<sub>2</sub>NH<sub>2</sub>), 3.16-3.30 (q, 2H, CH<sub>2</sub>NH), 5.92-6.07 (s, 1H, NH); (Found: C, 65.87; H, 11.48; N, 7.66. Calc. for C<sub>16</sub>H<sub>34</sub>N<sub>2</sub>O·1.1H<sub>2</sub>O: C, 65.87; H, 12.65; N, 8.63 %). *N',N''*-bis(dodecylaminocarbonylpropyl)-*N*<sup>α</sup>-benzyloxycarbonyl-L-glutamide (**27**): yield 2.46 g (73.4%); m.p. 179-181 °C; FT-IR (KBr): /cm<sup>-1</sup> 3322, 3290, 2960, 2924, 2856, 1690, 1651, 1636, 1543, 1468, 1460, 1379, 719 and 700; <sup>1</sup>H-NMR (CDCl<sub>3</sub>): δ 0.84-0.92 (t, 6H, CH<sub>3</sub> × 2), 1.17-1.35 (m, 36H, CH<sub>3</sub>(CH<sub>2</sub>)<sub>9</sub> × 2), 1.43-1.54 (m, 4H, CH<sub>3</sub>(CH<sub>2</sub>)<sub>9</sub>CH<sub>2</sub> × 2), 1.78-1.94 (m, 4H, (C=O)CH<sub>2</sub>CH<sub>2</sub>CH<sub>2</sub> × 2), 1.94-2.10 (m, 2H, \*CHCH<sub>2</sub>), 2.13-2.22 (t, 2H, \*CHCH<sub>2</sub>CH<sub>2</sub>), 2.22-2.39 (m, 4H, C(=O)CH<sub>2</sub>CH<sub>2</sub>CH<sub>2</sub> × 2), 3.12-3.50 (m, 8H, NHCH<sub>2</sub> × 4), 4.16-4.26 (q, 1H, \*CH), 5.06-5.13 (s, 2H, CH<sub>2</sub>C<sub>6</sub>H<sub>5</sub>), 6.10-6.20 (d, 2H, NH × 2), 6.22-6.30 (m, 1H, NH), 6.72-6.81 (s, 1H, NH), 7.30-7.40 (m, 5H, C<sub>6</sub>H<sub>5</sub>), 7.45-7.53 (m, 1H, NH); (Found: C, 67.73; H, 10.02; N, 8.53. Calc. for C<sub>45</sub>H<sub>79</sub>N<sub>5</sub>O<sub>6</sub>·0.7H<sub>2</sub>O: C, 67.73; H, 10.15; N, 8.78 %). *N',N''*-bis(dodecylaminocarbonylpropyl)-L-glutamide (**28**): yield 1.51 g (77.0 %); m.p. 168-173 °C; FT-IR (KBr): /cm<sup>-1</sup> 3312, 2960, 2922, 2854, 1638, 1543, 1470, 1452, 1369 and 719; <sup>1</sup>H-NMR (CDCl<sub>3</sub>): δ 0.83-0.94 (t, 6H, CH<sub>3</sub> × 2), 1.18-1.38 (m, 36H, CH<sub>3</sub>(CH<sub>2</sub>)<sub>9</sub> × 2), 1.43-1.55 (m, 4H, CH<sub>3</sub>(CH<sub>2</sub>)<sub>9</sub>CH<sub>2</sub> × 2), 1.57-1.72 (s, 6H, C(=O)CH<sub>2</sub>CH<sub>2</sub>CH<sub>2</sub> × 2, NH<sub>2</sub>), 1.77-1.90 (q, 2H, \*CHCH<sub>2</sub>), 2.14-2.28 (m, 4H, C(=O)CH<sub>2</sub>(CH<sub>2</sub>)<sub>2</sub> × 2), 2.28-2.36 (m, 2H, \*CHCH<sub>2</sub>CH<sub>2</sub>), 3.15-3.40 (m, 8H, CH<sub>2</sub>NH × 4),

4.07-4.16 (m, 1H, \*CH), 6.17-6.26 (m, 2H, NH  $\times$  2), 6.74-6.79 (t, 1H, NH), 7.60-7.67 (t, 1H, NH); (Found: C, 67.15; H, 11.05; N, 9.22. Calc. for C<sub>37</sub>H<sub>73</sub>N<sub>5</sub>O<sub>4</sub>·0.5H<sub>2</sub>O: C, 67.15; H, 10.28; N, 10.58 %). **5**, yield 0.227 g (64.3 %); m.p. 168-172 °C; FT-IR (KBr): /cm<sup>-1</sup> 3302, 2960, 2924, 2854, 1702, 1638, 1551, 1468, 1379 and 721;  $\delta$  0.80-0.96 (s, 6H, CH<sub>3</sub>  $\times$  2), 1.06-1.41 (m, 36H, CH<sub>3</sub>(CH<sub>2</sub>)<sub>9</sub>  $\times$  2), 1.41-1.57 (s, 4H, CH<sub>3</sub>(CH<sub>2</sub>)<sub>9</sub>CH<sub>2</sub>  $\times$  2), 1.61-2.09 (m, 8H, C(=O)CH<sub>2</sub>CH<sub>2</sub>  $\times$  4), 2.09-2.46 (m, 10H, C(=O)CH<sub>2</sub>  $\times$  5), 3.07-3.44 (m, 8H, CH<sub>2</sub>NH  $\times$  4), 4.07-4.17 (m, 1H, \*CH), 6.17-6.46 (m, 2H, NH  $\times$  2), 6.87-7.02 (m, 1H, NH), 7.10-7.20 (m, 1H, NH), 7.42-4.57 (m, 1H, NH); (Found: C, 65.09; H, 9.82; N, 9.07. Calc. for C<sub>42</sub>H<sub>79</sub>N<sub>5</sub>O<sub>7</sub>: C, 65.84; H, 10.39; N, 9.14 %).

***N',N''*-Dihexadecyl-*N* <sup>$\alpha$</sup> -[(4-carboxy)butanoyl]-L-glutamide (6)**. **6** was prepared by coupling of glutaric anhydride and *N',N''*-dihexadecyl-L-glutamide (**30**) prepared according to the previously described method<sup>1</sup> using 1-aminohexadecane instead of 1-aminododecane. *N',N''*-Dihexadecyl-*N* <sup>$\alpha$</sup> -benzyloxycarbonyl-L-glutamide (**29**): yield 3.6 g (87 %); m.p. 129.5 °C; FT-IR (KBr): /cm<sup>-1</sup> 3296, 2920, 2854, 1688, 1649 and 1560; <sup>1</sup>H-NMR (CDCl<sub>3</sub>):  $\delta$  0.70-1.03 (t, 6H, CH<sub>3</sub>  $\times$  2), 1.03-1.72 (m, 56H, CH<sub>3</sub>(CH<sub>2</sub>)<sub>14</sub>  $\times$  2), 1.72-2.63 (m, 4H, \*CH(CH<sub>2</sub>)<sub>2</sub>), 2.63-3.42 (m, 4H, CH<sub>2</sub>NH  $\times$  2), 4.03-4.40 (m, 1H, \*CH), 4.98-5.20 (s, 2H, CH<sub>2</sub>C<sub>6</sub>H<sub>5</sub>), 6.29 (br, 1H, NH), 6.90 (br, 1H, NH), 7.23-7.50 (s, 5H, C<sub>6</sub>H<sub>5</sub>). **30**, yield 6.5 g (95 %); m.p. 88-102 °C; FT-IR (KBr): /cm<sup>-1</sup> 3326, 2922, 2854, 1636 and 1533; <sup>1</sup>H-NMR (CDCl<sub>3</sub>):  $\delta$  0.70-1.01 (t, 6H, CH<sub>3</sub>  $\times$  2), 1.01-1.80 (m, 56H, CH<sub>3</sub>(CH<sub>2</sub>)<sub>14</sub>  $\times$  2), 1.80-2.20 (t, 2H, \*CHCH<sub>2</sub>), 2.20-2.54 (t, 2H, C(=O)CH<sub>2</sub>), 2.89 (br, 2H, NH<sub>2</sub>), 3.02-3.36 (m, 4H, CH<sub>2</sub>NH  $\times$  2), 3.68-4.70 (m, 1H, \*CH), 6.82 (br, 1H, NH), 7.41 (br, 1H, NH); **6**, yield 0.96 g (94 %); m.p. 123-135 °C; FT-IR (KBr): /cm<sup>-1</sup> 3298, 2958, 2920, 2854, 1719, 1640, 1555, 1470 and 719; <sup>1</sup>H-NMR (CDCl<sub>3</sub>):  $\delta$  0.79-0.97 (m, 6H, CH<sub>3</sub>  $\times$  2), 0.99-1.42 (m, 52H, CH<sub>3</sub>(CH<sub>2</sub>)<sub>13</sub>  $\times$  2), 1.42-1.62 (m, 56H, CH<sub>3</sub>(CH<sub>2</sub>)<sub>13</sub>CH<sub>2</sub>  $\times$  2), 1.84-2.04 (m, 2H, \*CHCH<sub>2</sub>), 2.04-2.19 (m, 2H, CH<sub>2</sub>CH<sub>2</sub>C(=O)O), 2.19-2.49 (m, 6H, C(=O)CH<sub>2</sub>  $\times$  3), 3.10-3.31 (m, 4H, CH<sub>2</sub>NH  $\times$  2), 4.31-4.47 (m, 1H, \*CH), 6.41-6.56 (m, 1H, NH), 6.99-7.14 (m, 1H, NH),

7.31-7.45 (m, 1H, NH); (Found: C, 69.75; H, 11.56; N, 5.93. Calc. for  $C_{42}H_{81}N_3O_5 \cdot 0.8H_2O$ : C, 69.75; H, 11.52; N, 5.81 %).

***N',N''*-Didodecyl-*N*<sup>α</sup>-[(4-carboxy-3-methyl)butanoyl]-L-glutamide (7).** 7 was prepared by coupling of *N',N''*-didodecyl-L-glutamide<sup>5</sup> and 3-methylglutaric anhydride as described above: yield 0.750 g (69.7 %); m.p. 115-121 °C; FT-IR (KBr): /cm<sup>-1</sup> 3296, 2960, 2922, 2854, 1719, 1638, 1557, 1468, 1379 and 721; <sup>1</sup>H-NMR (CDCl<sub>3</sub>): δ 0.82-0.94 (t, 6H, CH<sub>3</sub> × 2), 0.98-1.05 (d, 3H, CH<sub>3</sub>CH), 1.15-1.39 (m, 36H, CH<sub>3</sub>(CH<sub>2</sub>)<sub>9</sub> × 2), 1.39-1.59 (m, 4H, CH<sub>3</sub>(CH<sub>2</sub>)<sub>9</sub>CH<sub>2</sub> × 2), 1.59-1.74 (m, 1H, CH), 1.94-2.17 (m, 2H, \*CHCH<sub>2</sub>), 2.17-2.32 (m, 4H, NHC(=O)CH<sub>2</sub> × 2), 2.32-2.46 (m, 2H, CH<sub>2</sub>C(=O)O), 3.07-3.31 (m, 4H, CH<sub>2</sub>NH × 2), 3.85-3.95 (m, 1H, \*CH), 7.57-7.95 (m, 2H, NH × 2), 8.03-8.16 (m, 1H, NH); (Found: C, 67.88; H, 11.92; N, 6.80. Calc. For  $C_{35}H_{67}N_3O_5 \cdot 0.5H_2O$ : C, 67.88; H, 11.07; N, 6.79 %).

***N',N''*-Bis(octylaminocarbonylethyl)-*N*<sup>α</sup>-[(4-carboxy)butanoyl]-L-glutamide (8).** 1-Aminooctane (2.50 g, 19.3 mmol), β-Ala-Z (4.75 g, 21.3 mmol), and triethylamine (4.32 g, 42.7 mmol) were dissolved in 100 cm<sup>3</sup> of THF and stirred with cooling to 0 °C. To the solution was added DEPC (4.11 g, 25.2 mmol) and stirred in an ice bath for 30 min. After being stirred for 1 day at room temperature, the solution was concentrated *in vacuo*. The residue was dissolved in 200 cm<sup>3</sup> of chloroform and was washed with 5 wt% aqueous NaHCO<sub>3</sub> (200 cm<sup>3</sup>, in twice), deionized water (20 cm<sup>3</sup>, once), 0.3 N HCl (200 cm<sup>3</sup>, in twice), and deionized water (20 cm<sup>3</sup>, once). The solution was dried over Na<sub>2</sub>SO<sub>4</sub>. After filtration, the filtrate was concentrated *in vacuo* and recrystallized from methanol to give white powder *N*-octyl-3-(*N'*-benzyloxycarbonyl)aminopropanamide (**31**): yield 5.64 g (87.2 %); m.p. 115-119 °C; FT-IR (KBr): /cm<sup>-1</sup> 3344, 3308, 2960, 2928, 2874, 2854, 1686, 1638, 1537, 1464 and 698; <sup>1</sup>H-NMR (CDCl<sub>3</sub>): δ 0.84-0.91 (t, 3H, CH<sub>3</sub>), 1.20-1.36 (m, 10H, CH<sub>3</sub>(CH<sub>2</sub>)<sub>5</sub>), 1.41-1.51 (m, 2H, CH<sub>3</sub>(CH<sub>2</sub>)<sub>5</sub>CH<sub>2</sub>), 2.34-2.43 (t, 2H, C(=O)CH<sub>2</sub>), 3.16-3.24 (q, 2H, CH<sub>3</sub>(CH<sub>2</sub>)<sub>6</sub>CH<sub>2</sub>), 3.43-3.51 (q, 2H, C(=O)CH<sub>2</sub>CH<sub>2</sub>), 5.04-5.13 (s, 2H, CH<sub>2</sub>C<sub>6</sub>H<sub>5</sub>), 5.43-5.53 (s, 1H, NH), 5.62-5.72 (s, 1H, NH), 7.27-7.38 (m, 5H, C<sub>6</sub>H<sub>5</sub>). **31** (5.50 g, 16.4 mmol) was dissolved in 200 cm<sup>3</sup> of ethanol with heating and Pd black (1 g) was added to



the solution. H<sub>2</sub> gas was bubbled slowly into the solution for 5 hours. After confirming the removal of the Z-group by FTIR measurement, Pd black was removed by filtration. The filtration was concentrated and dried *in vacuo* to give yellowish oil *N*-octyl-3-aminopropanamide (**32**): yield 3.29 g (100 %); FT-IR (KBr): /cm<sup>-1</sup> 3298, 2960, 2922, 2854, 1649, 1553, 1450 and 721; <sup>1</sup>H-NMR (CDCl<sub>3</sub>): δ 0.83-0.93 (t, 3H, CH<sub>3</sub>), 1.18-1.37 (m, 10H, CH<sub>3</sub>(CH<sub>2</sub>)<sub>5</sub>), 1.43-1.55 (m, 2H, CH<sub>3</sub>(CH<sub>2</sub>)<sub>5</sub>CH<sub>2</sub>), 2.31-2.37 (t, 2H, C(=O)CH<sub>2</sub>), 2.43-2.52 (s, 2H, NH<sub>2</sub>), 2.98-3.05 (t, 2H, CH<sub>2</sub>NH<sub>2</sub>), 3.17-3.28 (q, 2H, NHCH<sub>2</sub>), 6.96-7.07 (s, 1H, NH). **32** (3.13 g, 15.6 mmol), L-Glu-Z (2.00 g, 7.11 mmol), and triethylamine (3.38 g, 33.4 mmol) were dissolved in 150 cm<sup>3</sup> of THF and stirred with cooling to 0 °C. DEPC (2.92 g, 17.9 mmol) was added to the mixture and stirred for 30 min in an ice bath. After being stirred for 1 day at room temperature, the solution was concentrated *in vacuo* and the residue was recrystallized from methanol to give white solid *N',N''*-bis(octylaminocarbonylethyl)-*N*<sup>α</sup>-benzyloxycarbonyl-L-glutamide **33**: yield 2.87 g (62.5 %); m.p. 221-224 °C; FT-IR (KBr): /cm<sup>-1</sup> 3300, 2960, 2928, 2858, 1692, 1644, 1547, 1456, 725 and 696; <sup>1</sup>H-NMR (CDCl<sub>3</sub>): δ 0.82-0.92 (m, 6H, CH<sub>3</sub> × 2), 1.16-1.24 (m, 20H, CH<sub>3</sub>(CH<sub>2</sub>)<sub>5</sub> × 2), 1.24-1.52 (m, 4H, CH<sub>3</sub>(CH<sub>2</sub>)<sub>5</sub>CH<sub>2</sub> × 2), 1.93-2.06 (m, 2H, \*CHCH<sub>2</sub>), 2.18-2.29 (m, 2H, \*CHCH<sub>2</sub>CH<sub>2</sub>), 2.34-2.45 (m, 2H, C(=O)CH<sub>2</sub>CH<sub>2</sub>NH), 3.13-3.27 (m, 4H, CH<sub>3</sub>(CH<sub>2</sub>)<sub>6</sub>CH<sub>2</sub> × 2), 3.40-3.66 (m, 4H, C(=O)CH<sub>2</sub>CH<sub>2</sub>NH × 2), 4.16-4.23 (m, 1H, \*CH), 5.05-5.12 (m, 2H, CH<sub>2</sub>C<sub>6</sub>H<sub>5</sub>), 5.66-5.72 (m, 1H, NH), 5.89-6.06 (m, 2H, NH × 2), 6.78-6.88 (m, 1H, NH), 7.30-7.47 (m, 6H, C<sub>6</sub>H<sub>5</sub>, NH). **33** (2.70 g, 4.18 mmol) was dissolved in 200 cm<sup>3</sup> of DMF with heating and Pd black (1 g) was added to the solution. H<sub>2</sub> gas was bubbled slowly into the solution for 6 hours. After confirming the removal of Z-group by FTIR measurement, Pd black was removed by filtration. The filtrate was concentrated and dried *in vacuo* to give white solid *N',N''*-bis(octylaminocarbonylethyl)-L-glutamide (**34**): yield 2.14 g (100 %); m.p. 181-185 °C; FT-IR (KBr): /cm<sup>-1</sup> 3298, 2960, 2924, 2854, 1638, 1549, 1468, 1377 and 723; <sup>1</sup>H-NMR (CDCl<sub>3</sub>): δ 0.81-0.95 (t, 6H, CH<sub>3</sub> × 2), 1.15-1.40 (m, 20H, CH<sub>3</sub>(CH<sub>2</sub>)<sub>5</sub> × 2), 1.40-1.56 (m, 4H, CH<sub>3</sub>(CH<sub>2</sub>)<sub>5</sub>CH<sub>2</sub> × 2), 1.87-2.53 (m, 10H, \*CH(CH<sub>2</sub>)<sub>2</sub>),

C(=O)CH<sub>2</sub>CH<sub>2</sub>NH × 2, NH<sub>2</sub>), 3.11-3.28 (q, 4H, CH<sub>3</sub>(CH<sub>2</sub>)<sub>6</sub>CH<sub>2</sub> × 2), 3.41-3.57 (m, 4H, C(=O)CH<sub>2</sub>CH<sub>2</sub>NH × 2), 4.01-4.17 (m, 1H, \*CH), 6.34-6.52 (m, 2H, NH × 2), 7.05-7.17 (m, 1H, NH), 7.93-8.02 (m, 1H, NH). **34** (1.40 g, 2.74 mmol) and triethylamine (0.293 g, 2.90 mmol) were dissolved in 100 cm<sup>3</sup> of DMF. Glutaric anhydride (0.468 g, 4.10 mmol) was added in the solution and stirred in an ice bath. After being stirred for 1 day at room temperature, the solution was concentrated *in vacuo*. The residue was recrystallized from methanol and dried *in vacuo* to give a white solid (**8**): yield 1.34 g (78.4 %); m.p. 207-209 °C; FT-IR (KBr) /cm<sup>-1</sup> 3300, 3290, 2960, 2928, 2858, 1709, 1638, 1553, 1456, 1438 and 723; <sup>1</sup>H-NMR (CDCl<sub>3</sub>): δ 0.76-0.95 (m, 6H, CH<sub>3</sub> × 2), 1.10-1.42 (m, 20H, CH<sub>3</sub>(CH<sub>2</sub>)<sub>5</sub> × 2), 1.42-2.79 (m, 18H, CH<sub>3</sub>(CH<sub>2</sub>)<sub>5</sub>CH<sub>2</sub> × 2, \*CH(CH<sub>2</sub>)<sub>2</sub>, (CH<sub>2</sub>)<sub>3</sub>C(=O)O, C(=O)CH<sub>2</sub>CH<sub>2</sub>NH × 2), 3.13-3.30 (m, 4H, CH<sub>3</sub>(CH<sub>2</sub>)<sub>6</sub>CH<sub>2</sub> × 2), 3.39-3.61 (m, 4H, C(=O)CH<sub>2</sub>CH<sub>2</sub>NH × 2), 3.96-4.18 (m, 1H, \*CH). (Found: C, 60.87; H, 9.46; N, 11.24. Calc. for C<sub>32</sub>H<sub>59</sub>N<sub>5</sub>O<sub>7</sub>·0.3H<sub>2</sub>O: C, 60.87; H, 9.52; N, 11.09 %).

***N',N''*-Bis(octylaminocarbonylethyl)-*N*<sup>α</sup>-[(3-carboxy)propanoyl]-L-glutamide (**9**).**

The related compound **9** was prepared as described above using succinic anhydride instead of glutaric anhydride: yield 0.453 g (75.8%); m.p. 191-193 °C; FT-IR (KBr): /cm<sup>-1</sup> 3298, 2960, 2928, 2858, 1719, 1644, 1551 and 723; <sup>1</sup>H-NMR (CDCl<sub>3</sub>): δ 0.78-0.90 (m, 6H, CH<sub>3</sub> × 2), 1.17-1.36 (m, 20H, CH<sub>3</sub>(CH<sub>2</sub>)<sub>5</sub> × 2), 1.36-1.92 (m, 6H, CH<sub>3</sub>(CH<sub>2</sub>)<sub>5</sub>CH<sub>2</sub> × 2, \*CHCH<sub>2</sub>), 1.92-2.73 (m, 10H, C(=O)CH<sub>2</sub>CH<sub>2</sub>NH × 2, \*CHCH<sub>2</sub>CH<sub>2</sub>, (CH<sub>2</sub>)<sub>2</sub>C(=O)O), 3.13-3.29 (m, 4H, CH<sub>3</sub>(CH<sub>2</sub>)<sub>6</sub>CH<sub>2</sub> × 2), 3.37-3.70 (m, 4H, C(=O)CH<sub>2</sub>CH<sub>2</sub>NH × 2), 4.00-4.15 (m, 1H, \*CH); (Found: C, 60.49; H, 9.33; N, 11.38. Calc. for C<sub>31</sub>H<sub>57</sub>N<sub>5</sub>O<sub>7</sub>·0.2H<sub>2</sub>O: C, 60.49; H, 9.40; N, 11.38 %).

**Anionic amphiphiles derived from basic α-amino acid (L-Lys)**

***N*<sup>α</sup>,*N*<sup>ε</sup>-Bis(hexadecanoyl)-*N*-[(3-carboxy)propyl]-L-lysine (**10**)** GABA (5.00 g, 48.5 mmol), benzyl alcohol (10.49 g, 97.0 mmol), and *p*-toluenesulfonic acid monohydrate (10.15 g, 53.4 mmol) were suspended in 300 cm<sup>3</sup> of toluene and refluxed for 5 hours,

removing water azeotropically. The reaction mixture was concentrated *in vacuo* and an excess amount of diethyl ether was added. The precipitates formed were collected and reprecipitated from methanol-diethyl ether. The solid was dried *in vacuo* to give white powder  $\gamma$ -aminobutyric acid benzyl ester *p*-toluenesulfonate (**35**): yield 17.20 g (97.1 %); m.p. 103-105 °C; FT-IR (KBr): /cm<sup>-1</sup> 2928, 1736, 1638, 1499, 1193 and 1038; <sup>1</sup>H-NMR (CDCl<sub>3</sub>):  $\delta$  1.80-1.91 (m, 2H, CH<sub>2</sub>CH<sub>2</sub>C(=O)), 2.26-2.34 (t, 5H, CH<sub>3</sub>, CH<sub>2</sub>C(=O)), 2.82-2.92 (t, 2H, <sup>+</sup>NH<sub>3</sub>CH<sub>2</sub>), 4.98-5.03 (s, 2H, CH<sub>2</sub>C<sub>6</sub>H<sub>5</sub>), 7.04-7.10 (d, 2H, CH<sub>3</sub>C<sub>6</sub>H<sub>4</sub>), 7.23-7.36 (m, 5H, C<sub>6</sub>H<sub>5</sub>), 7.66-7.80 (d, 5H, C<sub>6</sub>H<sub>4</sub>SO<sub>3</sub><sup>-</sup><sup>+</sup>NH<sub>3</sub>).  $\delta$ -Aminovaleric acid benzyl ester *p*-toluenesulfonate (**36**) and  $\epsilon$ -aminocaproic acid benzyl ester *p*-toluenesulfonate (**37**) were prepared similarly: **36**, yield 6.18 g (95.3 %); m.p. 74-76 °C; FT-IR (KBr): /cm<sup>-1</sup> 3074, 1744, 1632, 1489, 1170 and 1033; <sup>1</sup>H-NMR (CDCl<sub>3</sub>):  $\delta$  1.45-1.57 (m, 4H, (CH<sub>2</sub>)<sub>2</sub>CH<sub>2</sub>C(=O)), 2.12-2.21 (t, 2H, CH<sub>2</sub>C(=O)), 2.27-2.33 (s, 3H, CH<sub>3</sub>), 2.71-2.79 (t, 2H, <sup>+</sup>NH<sub>3</sub>CH<sub>2</sub>), 5.01-5.06 (s, 2H, CH<sub>2</sub>C<sub>6</sub>H<sub>5</sub>), 7.09-7.17 (d, 2H, CH<sub>3</sub>C<sub>6</sub>H<sub>4</sub>), 7.26-7.37 (m, 5H, C<sub>6</sub>H<sub>5</sub>), 7.56-7.76 (m, 5H, C<sub>6</sub>H<sub>4</sub>SO<sub>3</sub><sup>-</sup><sup>+</sup>NH<sub>3</sub>). **37**, yield 13.92 g (92.9 %); m.p. 103-106 °C; FT-IR (KBr): /cm<sup>-1</sup> 3048, 1729, 1628, 1483, 1178 and 1040; <sup>1</sup>H-NMR (CDCl<sub>3</sub>):  $\delta$  1.13-1.24 (m, 2H, CH<sub>2</sub>(CH<sub>2</sub>)<sub>2</sub>C(=O)), 1.42-1.54 (m, 4H, CH<sub>2</sub>CH<sub>2</sub>CH<sub>2</sub>CH<sub>2</sub>C(=O)), 2.16-2.24 (t, 2H, CH<sub>2</sub>C(=O)), 2.28-2.36 (s, 3H, CH<sub>3</sub>), 2.69-2.79 (m, 2H, <sup>+</sup>NH<sub>3</sub>CH<sub>2</sub>), 5.04-5.10 (s, 2H, CH<sub>2</sub>C<sub>6</sub>H<sub>5</sub>), 7.11-7.19 (d, 2H, CH<sub>3</sub>C<sub>6</sub>H<sub>4</sub>), 7.27-7.38 (m, 5H, C<sub>6</sub>H<sub>5</sub>), 7.57-7.79 (m, 5H, C<sub>6</sub>H<sub>4</sub>SO<sub>3</sub><sup>-</sup><sup>+</sup>NH<sub>3</sub>). *N* <sup>$\alpha$</sup> ,*N* <sup>$\epsilon$</sup> -Dihexadecanoyl-L-lysine<sup>3a</sup> (1.50 g, 2.41 mmol), **35** (1.32 g, 3.61 mmol), and triethylamine (0.614 g, 6.07 mmol) were dissolved in 100 cm<sup>3</sup> of THF and stirred with cooling to 0 °C. DEPC (0.560 g, 3.43 mmol) was added to the mixture and stirred for 30 min in an ice bath. After being stirred for 1 day at room temperature, the solution was concentrated *in vacuo* and the residue was dissolved in 250 cm<sup>3</sup> of chloroform. The solution was washed with 5 wt% aqueous NaHCO<sub>3</sub> (200 cm<sup>3</sup>, in twice), deionized water (20 cm<sup>3</sup>, once), 0.3 N HCl (200 cm<sup>3</sup>, in twice), and deionized water (20 cm<sup>3</sup>, once). The solution was dried over Na<sub>2</sub>SO<sub>4</sub>. After filtration, the filtrate was concentrated *in vacuo* and recrystallized from methanol to give white solid *N* <sup>$\alpha$</sup> ,*N* <sup>$\epsilon$</sup> -

dihexadecanoyl-*N*-[3-(benzyloxycarbonyl)propyl]-*L*-lysineamide **38**: yield 1.76 g (91.7 %); m.p. 110-115 °C; FT-IR (KBr): /cm<sup>-1</sup> 3314, 2954, 2920, 2854, 1738, 1640, 1557, 1470, 719 and 700; <sup>1</sup>H-NMR (CDCl<sub>3</sub>): δ 0.69-0.93 (t, 6H, CH<sub>3</sub> × 2), 0.93-1.37 (m, 50H, CH<sub>3</sub>(CH<sub>2</sub>)<sub>12</sub> × 2, \*CHCH<sub>2</sub>CH<sub>2</sub>), 1.37-1.94 (m, 10H, CH<sub>3</sub>(CH<sub>2</sub>)<sub>12</sub>CH<sub>2</sub> × 2, \*CHCH<sub>2</sub>CH<sub>2</sub>CH<sub>2</sub>, CH<sub>2</sub>CH<sub>2</sub>C(=O)O), 2.02-2.26 (m, 4H, CH<sub>3</sub>(CH<sub>2</sub>)<sub>13</sub>CH<sub>2</sub> × 2), 2.26-2.53 (m, 2H, CH<sub>2</sub>C(=O)O), 3.11-3.35 (m, 2H, NHCH<sub>2</sub>), 3.35-3.52 (m, 2H, NHCH<sub>2</sub>), 4.21-4.51 (m, 1H, \*CH), 5.04-5.16 (s, 2H, CH<sub>2</sub>C<sub>6</sub>H<sub>5</sub>), 5.68-6.03 (m, 1H, NH), 6.42-6.67 (m, 1H, NH), 6.70-7.01 (m, 1H, NH), 7.27-7.46 (m, 5H, C<sub>6</sub>H<sub>5</sub>). **38** (1.50 g, 1.88 mmol) was dissolved in 200 cm<sup>3</sup> of THF with heating and Pd black (1 g) was added to the solution. H<sub>2</sub> gas was bubbled slowly into the solution for 6 hours. After confirming the removal of benzyl group by FTIR measurement, Pd black was removed by filtration. The filtrate was concentrated *in vacuo* and the residue was recrystallized from methanol to give white solid (**10**): yield 1.24 g (93.2 %); m.p. 115-119 °C; FT-IR (KBr): /cm<sup>-1</sup> 3316, 2958, 2920, 2854, 1719, 1638, 1562, 1462 and 719; <sup>1</sup>H-NMR (CDCl<sub>3</sub>): δ 0.75-0.95 (m, 6H, CH<sub>3</sub> × 2), 1.06-1.43 (m, 50H, CH<sub>3</sub>(CH<sub>2</sub>)<sub>12</sub> × 2, \*CHCH<sub>2</sub>CH<sub>2</sub>), 1.47-1.93 (m, 10H, CH<sub>2</sub>CH<sub>2</sub>C(=O) × 3, \*CHCH<sub>2</sub>CH<sub>2</sub>CH<sub>2</sub>), 2.07-2.29 (m, 4H, CH<sub>3</sub>(CH<sub>2</sub>)<sub>13</sub>CH<sub>2</sub> × 2), 2.35-2.44 (m, 2H, CH<sub>2</sub>C(=O)O), 3.12-3.44 (m, 2H, NHCH<sub>2</sub>), 3.66-3.80 (m, 2H, NHCH<sub>2</sub>), 4.51-4.64 (m, 1H, \*CH), 5.60-5.69 (m, 2H, NH × 2), 6.11-6.22 (m, 1H, NH); (Found: C, 67.86; H, 11.15; N, 6.16. Calc. for C<sub>42</sub>H<sub>81</sub>N<sub>3</sub>O<sub>5</sub>·2.0H<sub>2</sub>O: C, 67.86; H, 11.51; N, 5.65 %).

*N*<sup>α</sup>,*N*<sup>ε</sup>-dihexadecanoyl-*N*-[(4-carboxy)butyl]-*L*-lysineamide (**11**). The related compound **11** was prepared similarly using **36** instead of **35**, via *N*<sup>α</sup>,*N*<sup>ε</sup>-bis(hexadecanoyl)-*N*-[4-(benzyloxycarbonyl)butyl]-*L*-lysineamide (**39**). **39**, yield 0.77 g (81 %); m.p. 98-102 °C; FT-IR (KBr): /cm<sup>-1</sup> 3316, 2958, 2920, 2852, 1738, 1638, 1562, 1466, 719 and 698; <sup>1</sup>H-NMR (CDCl<sub>3</sub>): δ 0.87-1.00 (t, 6H, CH<sub>3</sub> × 2), 1.03-1.40 (m, 50H, CH<sub>3</sub>(CH<sub>2</sub>)<sub>12</sub> × 2, \*CHCH<sub>2</sub>CH<sub>2</sub>), 1.40-2.01 (m, 12H, CH<sub>3</sub>(CH<sub>2</sub>)<sub>12</sub>CH<sub>2</sub> × 2, \*CHCH<sub>2</sub>CH<sub>2</sub>CH<sub>2</sub>, (CH<sub>2</sub>)<sub>2</sub>CH<sub>2</sub>C(=O)O), 2.01-2.50 (m, 6H, CH<sub>2</sub>C(=O) × 3), 2.85-3.09 (m, 2H, NHCH<sub>2</sub>), 3.09-3.37 (m, 2H, NHCH<sub>2</sub>), 4.22-4.55 (m, 1H, \*CH), 5.06-5.22 (s, 2H, CH<sub>2</sub>C<sub>6</sub>H<sub>5</sub>), 5.67-6.11 (m,

1H, NH), 6.43-6.86 (m, 2H, NH  $\times$  2), 7.30-7.67 (m, 5H, C<sub>6</sub>H<sub>5</sub>). **11**, yield 0.53 g (92 %); m.p. 104-109 °C; FT-IR (KBr): /cm<sup>-1</sup> 3316, 2958, 2920, 2854, 1719, 1638, 1562, 1462 and 719; <sup>1</sup>H-NMR (CDCl<sub>3</sub>):  $\delta$  0.75-0.99 (m, 6H, CH<sub>3</sub>  $\times$  2), 0.99-1.41 (m, 50H, CH<sub>3</sub>(CH<sub>2</sub>)<sub>12</sub>  $\times$  2, \*CHCH<sub>2</sub>CH<sub>2</sub>), 1.41-1.83 (m, 12H, CH<sub>3</sub>(CH<sub>2</sub>)<sub>12</sub>CH<sub>2</sub>  $\times$  2, \*CHCH<sub>2</sub>CH<sub>2</sub>CH<sub>2</sub>, (CH<sub>2</sub>)<sub>2</sub>CH<sub>2</sub>C(=O)O), 2.03-2.43 (m, 6H, CH<sub>2</sub>C(=O)  $\times$  3), 3.12-3.47 (m, 4H, NHCH<sub>2</sub>  $\times$  2), 4.18-4.54 (m, 1H, \*CH); (Found: C, 68.18; H, 11.24; N, 6.02. Calc. for C<sub>43</sub>H<sub>83</sub>N<sub>3</sub>O<sub>5</sub>·2.0H<sub>2</sub>O: C, 68.18; H, 11.57; N, 5.55 %).

*N* <sup>$\alpha$</sup> ,*N* <sup>$\epsilon$</sup> -dihexadecanoyl-*N*-[(5-carboxy)pentyl]-L-lysineamide (**12**). The related compound **12** was prepared similarly using **37** instead of **35**, via *N* <sup>$\alpha$</sup> ,*N* <sup>$\epsilon$</sup> -bis(hexadecanoyl)-*N*-[5-(benzyloxycarbonyl)pentyl]-L-lysineamide (**40**). **40**, yield 0.89 g (92 %); m.p. 106-109 °C; FT-IR (KBr): /cm<sup>-1</sup> 3316, 2958, 2920, 2854, 1738, 1638, 1562, 1466, 719 and 698; <sup>1</sup>H-NMR (CDCl<sub>3</sub>):  $\delta$  0.73-1.00 (t, 6H, CH<sub>3</sub>  $\times$  2), 1.03-1.36 (m, 52H, CH<sub>3</sub>(CH<sub>2</sub>)<sub>12</sub>  $\times$  2, \*CHCH<sub>2</sub>CH<sub>2</sub>, CH<sub>2</sub>(CH<sub>2</sub>)<sub>2</sub>C(=O)O), 1.36-1.90 (m, 12H, CH<sub>3</sub>(CH<sub>2</sub>)<sub>12</sub>CH<sub>2</sub>  $\times$  2, \*CHCH<sub>2</sub>CH<sub>2</sub>CH<sub>2</sub>, CH<sub>2</sub>CH<sub>2</sub>CH<sub>2</sub>CH<sub>2</sub>C(=O)O), 2.00-2.50 (m, 6H, CH<sub>2</sub>C(=O)  $\times$  3), 2.86-3.10 (m, 2H, NHCH<sub>2</sub>), 3.16-3.39 (m, 2H, NHCH<sub>2</sub>), 4.19-4.49 (m, 1H, \*CH), 5.03-5.17 (s, 2H, CH<sub>2</sub>C<sub>6</sub>H<sub>5</sub>), 5.67-5.96 (m, 1H, NH), 6.44-6.80 (m, 2H, NH  $\times$  2), 7.31-7.58 (m, 5H, C<sub>6</sub>H<sub>5</sub>). **12**, yield 0.61 g (91 %); m.p. 108-111 °C; FT-IR (KBr): /cm<sup>-1</sup> 3318, 2958, 2920, 2854, 1717, 1638, 1560, 1468 and 719; <sup>1</sup>H-NMR (CDCl<sub>3</sub>):  $\delta$  0.76-1.00 (t, 6H, CH<sub>3</sub>  $\times$  2), 1.06-1.37 (m, 52H, CH<sub>3</sub>(CH<sub>2</sub>)<sub>12</sub>  $\times$  2, \*CHCH<sub>2</sub>CH<sub>2</sub>, CH<sub>2</sub>(CH<sub>2</sub>)<sub>2</sub>C(=O)O), 1.37-1.89 (m, 12H, CH<sub>3</sub>(CH<sub>2</sub>)<sub>12</sub>CH<sub>2</sub>  $\times$  2, \*CHCH<sub>2</sub>, \*CH(CH<sub>2</sub>)<sub>2</sub>CH<sub>2</sub>, CH<sub>2</sub>CH<sub>2</sub>CH<sub>2</sub>CH<sub>2</sub>C(=O)O), 2.07-2.47 (m, 6H, CH<sub>2</sub>C(=O)  $\times$  3), 3.16-3.45 (m, 4H, NHCH<sub>2</sub>  $\times$  2), 6.43-6.59 (m, 2H, NH  $\times$  2), 6.90-7.08 (m, 1H, NH); (Found: C, 71.13; H, 11.49; N, 5.87. Calc. for C<sub>44</sub>H<sub>85</sub>N<sub>3</sub>O<sub>5</sub>·0.4H<sub>2</sub>O: C, 71.13; H, 11.63; N, 5.66 %).

*N* <sup>$\alpha$</sup> ,*N* <sup>$\epsilon$</sup> -Bis[3-(*N*-dodecanoyl)aminopropanoyl]-*N*'-[(2-carboxy)ethyl]-L-lysineamide (**13**).  $\beta$ -Alanine benzyl ester *p*-toluenesulfonate<sup>2a</sup> (7.12 g, 20.2 mmol), dodecanoic acid (3.44 g, 17.0 mmol), and triethylamine (6.84 g, 67.6 mmol) were dissolved in 100 cm<sup>3</sup> of THF and stirred with cooling to 0°C. DEPC (4.72 g, 26.0 mmol) was added to the solution

and stirred for 30 min in an ice bath. After being stirred for 1 day at room temperature, the solution was concentrated *in vacuo* and the residue was dissolved in 250 cm<sup>3</sup> of chloroform. The solution was washed with 5 wt% aqueous NaHCO<sub>3</sub> (200 cm<sup>3</sup>, in twice), deionized water (20 cm<sup>3</sup>, once), 0.3 N HCl (200 cm<sup>3</sup>, in twice), and deionized water (20 cm<sup>3</sup>, once). The solution was dried over Na<sub>2</sub>SO<sub>4</sub>. After filtration, the filtrate was concentrated *in vacuo* and recrystallized from methanol to give white solid *N*-dodecanoyl-β-alanine benzyl ester (**41**): yield 5.65 g (91.6 %); m.p. 76-77 °C; FT-IR (KBr): /cm<sup>-1</sup> 3312, 2958, 2920, 2854, 1738, 1723, 1640, 1551, 1460, 1446 and 1373; <sup>1</sup>H-NMR (CDCl<sub>3</sub>): δ 0.85-0.92 (t, 3H, CH<sub>3</sub>), 1.20-1.34 (m, 16H, CH<sub>3</sub>(CH<sub>2</sub>)<sub>8</sub>), 1.53-1.62 (m, 2H, CH<sub>3</sub>(CH<sub>2</sub>)<sub>8</sub>CH<sub>2</sub>), 2.09-2.14 (t, 2H, CH<sub>3</sub>(CH<sub>2</sub>)<sub>9</sub>CH<sub>2</sub>), 2.56-2.62 (t, 2H, CH<sub>2</sub>C(=O)O), 3.50-3.56 (q, 2H, NHCH<sub>2</sub>), 5.10-5.16 (s, 2H, CH<sub>2</sub>C<sub>6</sub>H<sub>5</sub>), 5.98-6.06 (m, 1H, NH), 7.30-7.39 (m, 5H, C<sub>6</sub>H<sub>5</sub>). **41** (5.21 g, 14.4 mmol) was dissolved in 200 cm<sup>3</sup> of THF with heating and Pd black (1 g) was added to the solution. H<sub>2</sub> gas was bubbled slowly into the solution for 6 hours. After confirming the removal of benzyl group by FTIR measurement, Pd black was removed by filtration. The filtrate was concentrated and dried *in vacuo* to give white powder *N*-dodecanoyl-β-alanine (**42**): yield 3.61 g (100 %); m.p. 114-117 °C; FT-IR (KBr): /cm<sup>-1</sup> 3304, 2958, 2920, 2854, 1696, 1638, 1551, 1448 and 717; <sup>1</sup>H-NMR (CDCl<sub>3</sub>): δ 0.85-0.91 (t, 3H, CH<sub>3</sub>), 1.20-1.35 (m, 16H, CH<sub>3</sub>(CH<sub>2</sub>)<sub>8</sub>), 1.56-1.66 (m, 2H, CH<sub>3</sub>(CH<sub>2</sub>)<sub>8</sub>CH<sub>2</sub>), 2.14-2.20 (t, 2H, CH<sub>3</sub>(CH<sub>2</sub>)<sub>9</sub>CH<sub>2</sub>), 2.58-2.63 (t, 2H, CH<sub>2</sub>C(=O)O), 3.50-3.56 (q, 2H, NHCH<sub>2</sub>), 5.38 (br, 1H, OH), 6.07-6.15 (m, 1H, NH). L-Lysine benzyl ester bis(*p*-toluenesulfonate)<sup>2a</sup> (2.01 g, 3.64 mmol), **42** (2.18 g, 8.00 mmol), and triethylamine (1.39 g, 13.7 mmol) were dissolved in 100 cm<sup>3</sup> of THF and stirred with cooling to 0 °C. DEPC (1.61 g, 8.87 mmol) was added to the solution and stirred for 30 min in an ice bath. After being stirred for 1 day at room temperature, the solution was concentrated *in vacuo* and recrystallized from methanol to give white solid *N*<sup>α</sup>,*N*<sup>ε</sup>-bis[3-(*N*-dodecanoyl)aminopropanoyl]-L-lysine benzyl ester (**43**): yield 2.27 g (88.3 %); m.p. 167-170 °C; FT-IR (KBr): /cm<sup>-1</sup> 3304, 2922, 1742, 1640 and 1551; <sup>1</sup>H-NMR (CDCl<sub>3</sub>): δ 0.83-0.94 (t, 6H, CH<sub>3</sub> × 2), 1.17-1.43 (m, 34H,

$\text{CH}_3(\text{CH}_2)_8 \times 2$ ,  $^*\text{CHCH}_2\text{CH}_2$ , 1.43-1.88 (m, 8H,  $\text{CH}_3(\text{CH}_2)_8\text{CH}_2 \times 2$ ,  $^*\text{CHCH}_2\text{CH}_2\text{CH}_2$ ), 2.11-2.21 (m, 4H,  $\text{CH}_3(\text{CH}_2)_9\text{CH}_2 \times 2$ ), 2.33-2.54 (m, 4H,  $\text{NHCH}_2\text{CH}_2\text{C}(=\text{O}) \times 2$ ), 3.07-3.16 (m, 2H,  $^*\text{CH}(\text{CH}_2)_3\text{CH}_2$ ), 3.40-3.60 (m, 4H,  $\text{NHCH}_2\text{CH}_2\text{C}(=\text{O}) \times 2$ ), 4.48-4.55 (m, 1H,  $^*\text{CH}$ ), 5.10-5.23 (q, 2H,  $\text{CH}_2\text{C}_6\text{H}_5$ ), 6.37-6.44 (t, 1H,  $\text{NH}$ ), 6.69-6.76 (t, 1H,  $\text{NH}$ ), 6.81-6.88 (t, 1H,  $\text{NH}$ ), 6.88-6.94 (d, 1H,  $\text{NH}$ ), 7.31-7.41 (m, 5H,  $\text{C}_6\text{H}_5$ ). **43** (2.05 g, 2.76 mmol) was dissolved in 200 cm<sup>3</sup> of THF with heating and Pd black (1 g) was added to the solution. H<sub>2</sub> gas was bubbled slowly into the solution for 6 hours. After confirming the removal of benzyl group by FTIR measurement, Pd black was removed by filtration. The filtrate was concentrated and dried *in vacuo* to give white solid *N*<sup>α</sup>,*N*<sup>ε</sup>-bis[3-(*N*-dodecanoyl)aminopropanoyl]-L-lysine (**44**): yield 1.80 g (100 %); m.p. 186-188 °C; FT-IR (KBr): /cm<sup>-1</sup> 3306, 2920, 1717, 1642 and 1555; <sup>1</sup>H-NMR (CDCl<sub>3</sub>): δ 0.83-0.94 (t, 6H,  $\text{CH}_3 \times 2$ ), 1.19-1.40 (m, 34H,  $\text{CH}_3(\text{CH}_2)_8 \times 2$ ,  $^*\text{CHCH}_2\text{CH}_2$ ), 1.46-1.95 (m, 8H,  $\text{CH}_3(\text{CH}_2)_8\text{CH}_2 \times 2$ ,  $^*\text{CHCH}_2\text{CH}_2\text{CH}_2$ ), 2.12-2.24 (m, 4H,  $\text{CH}_3(\text{CH}_2)_9\text{CH}_2 \times 2$ ), 2.40-2.54 (m, 4H,  $\text{NHCH}_2\text{CH}_2\text{C}(=\text{O}) \times 2$ ), 3.10-3.21 (m, 2H,  $^*\text{CH}(\text{CH}_2)_3\text{CH}_2$ ), 3.34-3.64 (m, 4H,  $\text{NHCH}_2\text{CH}_2\text{C}(=\text{O}) \times 2$ ), 4.47-4.56 (m, 1H,  $^*\text{CH}$ ), 6.10-6.18 (m, 1H,  $\text{NH}$ ), 6.27-6.33 (m, 1H,  $\text{NH}$ ), 6.69-6.79 (m, 2H,  $\text{NH} \times 2$ ). **44** (0.801 g 1.23 mmol), β-alanine benzyl ester *p*-toluenesulfonate<sup>2a</sup> (0.649 g, 1.84 mmol), and triethylamine (0.395 g, 3.69 mmol) was dissolved in 100 cm<sup>3</sup> of THF and stirred with cooling to 0 °C. DEPC (0.490 g, 2.46 mmol) was added to the mixture and stirred for 30 min in an ice bath. After being stirred for 1 day at room temperature, the solution was concentrated *in vacuo* and the residue was recrystallized from methanol to give white solid *N*<sup>α</sup>,*N*<sup>ε</sup>-bis[3-(*N*-dodecanoyl)aminopropanoyl]-*N*'-[3-(benzyloxycarbonyl)ethyl]-L-lysine (**45**): yield 0.756 g (76 %); m.p. 176-185 °C; FT-IR (KBr): /cm<sup>-1</sup> 3306, 2920, 1740, 1640 and 1557; <sup>1</sup>H-NMR (CDCl<sub>3</sub>): δ 0.83-0.92 (t, 6H,  $\text{CH}_3 \times 2$ ), 1.19-1.42 (m, 34H,  $\text{CH}_3(\text{CH}_2)_8 \times 2$ ,  $^*\text{CHCH}_2\text{CH}_2$ ), 1.42-1.84 (m, 8H,  $\text{CH}_3(\text{CH}_2)_8\text{CH}_2 \times 2$ ,  $^*\text{CHCH}_2\text{CH}_2\text{CH}_2$ ), 2.12-2.21 (t, 4H,  $\text{CH}_3(\text{CH}_2)_9\text{CH}_2 \times 2$ ), 2.38-2.65 (m, 6H,  $\text{NHCH}_2\text{CH}_2\text{C}(=\text{O}) \times 3$ ), 3.07-3.22 (m, 2H,  $^*\text{CH}(\text{CH}_2)_3\text{CH}_2$ ), 3.43-3.61 (m, 6H,  $\text{NHCH}_2\text{CH}_2\text{C}(=\text{O}) \times 3$ ), 4.20-4.29 (m, 1H,  $^*\text{CH}$ ), 5.10-

5.16 (s, 2H,  $\text{CH}_2\text{C}_6\text{H}_5$ ), 6.45-6.50 (m, 1H,  $\text{NH}$ ), 6.67-6.73 (m, 1H,  $\text{NH}$ ), 6.79-6.89 (m, 2H,  $\text{NH} \times 2$ ), 6.97-7.03 (m, 1H,  $\text{NH}$ ), 7.28-7.42 (m, 5H,  $\text{C}_6\text{H}_5$ ). **45** (0.446 g, 0.548 mmol) was dissolved in 200  $\text{cm}^3$  of THF with heating and Pd black (1 g) was added to the solution.  $\text{H}_2$  gas was bubbled slowly into the solution for 6 hours. After confirming the removal of benzyl group by FTIR measurement, Pd black was removed by filtration. The filtrate was concentrated *in vacuo* and the residue was recrystallized from methanol to give white solid *N* $^\alpha$ ,*N* $^\epsilon$ -bis[3-(*N*-dodecanoyl)aminopropanoyl]-*N*'-[(2-carboxy)ethyl]-L-lysineamide (**13**): yield 0.361 g (81 %); m.p. 182-186 °C; FT-IR (KBr):  $\text{cm}^{-1}$  3304, 2958, 1719, 1640 and 1555;  $^1\text{H-NMR}$  ( $\text{CDCl}_3$ ):  $\delta$  0.79-0.93 (t, 6H,  $\text{CH}_3 \times 2$ ), 1.16-1.41 (m, 34H,  $\text{CH}_3(\text{CH}_2)_8 \times 2$ ,  $^*\text{CHCH}_2\text{CH}_2$ ), 1.46-1.66 (m, 8H,  $\text{CH}_3(\text{CH}_2)_8\text{CH}_2 \times 2$ ,  $^*\text{CHCH}_2\text{CH}_2\text{CH}_2$ ), 2.08-2.30 (m, 4H,  $\text{CH}_3(\text{CH}_2)_9\text{CH}_2 \times 2$ ), 2.39-2.70 (m, 6H,  $\text{NHCH}_2\text{CH}_2\text{C}(=\text{O}) \times 3$ ), 3.23-3.30 (q, 2H,  $^*\text{CH}(\text{CH}_2)_3\text{CH}_2$ ), 3.35-3.62 (m, 6H,  $\text{NHCH}_2\text{CH}_2\text{C}(=\text{O}) \times 3$ ), 4.46-4.56 (m, 1H,  $^*\text{CH}$ ), 6.16-6.26 (m, 1H,  $\text{NH}$ ), 6.45-6.59 (m, 1H,  $\text{NH}$ ), 6.64-6.73 (m, 1H,  $\text{NH}$ ), 6.73-6.83 (m, 1H,  $\text{NH}$ ), 6.83-6.91 (m, 1H,  $\text{NH}$ ); (Found: C, 64.60; H, 10.12; N, 9.21. Calc. for  $\text{C}_{39}\text{H}_{73}\text{N}_5\text{O}_7$ : C, 64.60; H, 10.16; N, 9.66 %).

*N* $^\alpha$ ,*N* $^\epsilon$ -bis[3-(*N*-decanoyl)aminopropanoyl]-*N*'-[(2-carboxy)ethyl]-L-lysineamide (**14**). The compound **14** related to **13** was prepared as described above using decanoic acid instead of dodecanoic acid. *N*-Decanoyl- $\beta$ -alanine benzyl ester (**46**): yield 2.45 g (79.2 %); m.p. 65-66 °C; FT-IR (KBr):  $\text{cm}^{-1}$  3310, 2920, 2854, 1738, 1723, 1640 and 1551;  $^1\text{H-NMR}$  ( $\text{CDCl}_3$ ):  $\delta$  0.84-0.92 (t, 3H,  $\text{CH}_3$ ), 1.18-1.35 (m, 12H,  $\text{CH}_3(\text{CH}_2)_6$ ), 1.49-1.63 (m, 2H,  $\text{CH}_3(\text{CH}_2)_6\text{CH}_2$ ), 2.07-2.16 (t, 2H,  $\text{CH}_3(\text{CH}_2)_7\text{CH}_2$ ), 2.55-2.63 (t, 2H,  $\text{CH}_2\text{C}(=\text{O})\text{O}$ ), 3.47-3.56 (q, 2H,  $\text{NHCH}_2$ ), 5.09-5.19 (s, 2H,  $\text{CH}_2\text{C}_6\text{H}_5$ ), 5.97-6.07 (s, 1H,  $\text{NH}$ ), 7.28-7.42 (m, 5H,  $\text{C}_6\text{H}_5$ ). *N*-decanoyl- $\beta$ -alanine (**47**): yield 1.46 g (99.0 %); m.p. 105-108 °C; FT-IR (KBr):  $\text{cm}^{-1}$  3302, 3066, 2958, 2920, 2854, 1694, 1638 and 1547;  $^1\text{H-NMR}$  ( $\text{CDCl}_3$ ):  $\delta$  0.83-0.94 (t, 3H,  $\text{CH}_3$ ), 1.18-1.33 (m, 12H,  $\text{CH}_3(\text{CH}_2)_6$ ), 1.56-1.68 (m, 2H,  $\text{CH}_3(\text{CH}_2)_6\text{CH}_2$ ), 2.14-2.23 (t, 2H,  $\text{CH}_3(\text{CH}_2)_7\text{CH}_2$ ), 2.54-2.64 (t, 2H,  $\text{CH}_2\text{C}(=\text{O})\text{O}$ ), 3.49-3.58 (q, 2H,  $\text{NHCH}_2$ ), 6.24-6.33 (s, 1H,  $\text{NH}$ ), 8.00 (br, 1H,  $\text{OH}$ ). *N* $^\alpha$ ,*N* $^\epsilon$ -bis[3-(*N*-



decanoyl)aminopropanoyl]-L-lysine benzyl ester (**48**): yield 0.716 g (46.3 %); m.p. 158-159 °C; FT-IR (KBr): /cm<sup>-1</sup> 3304, 3082, 2958, 2924, 2854, 1744, 1640 and 1553; <sup>1</sup>H-NMR (CDCl<sub>3</sub>): δ 0.83-0.93 (t, 6H, CH<sub>3</sub> × 2), 1.19-1.39 (m, 26H, CH<sub>3</sub>(CH<sub>2</sub>)<sub>6</sub> × 2, \*CHCH<sub>2</sub>CH<sub>2</sub>), 1.39-1.88 (m, 8H, CH<sub>3</sub>(CH<sub>2</sub>)<sub>6</sub>CH<sub>2</sub> × 2, \*CHCH<sub>2</sub>CH<sub>2</sub>CH<sub>2</sub>), 2.10-2.22 (m, 4H, CH<sub>3</sub>(CH<sub>2</sub>)<sub>7</sub>CH<sub>2</sub> × 2), 2.39-2.54 (m, 4H, NHCH<sub>2</sub>CH<sub>2</sub>C(=O) × 2), 3.07-3.39 (m, 2H, \*CH(CH<sub>2</sub>)<sub>3</sub>CH<sub>2</sub>), 3.39-3.60 (m, 4H, NHCH<sub>2</sub>CH<sub>2</sub>C(=O) × 2), 4.48-4.56 (m, 1H, \*CH), 5.09-5.22 (q, 2H, CH<sub>2</sub>C<sub>6</sub>H<sub>5</sub>), 6.49-6.55 (t, 1H, NH), 6.75-6.83 (t, 1H, NH), 6.91-6.95 (t, 1H, NH), 6.95-7.01 (d, 1H, NH), 7.30-7.40 (m, 5H, C<sub>6</sub>H<sub>5</sub>). *N*<sup>α</sup>,*N*<sup>ε</sup>-bis[3-(*N*-decanoyl)aminopropanoyl]-L-lysine (**49**): yield 0.538 g (100 %); m.p. 176-178 °C; FT-IR (KBr): /cm<sup>-1</sup> 3302, 3084, 2958, 2924, 2856, 1731, 1642 and 1551. *N*<sup>α</sup>,*N*<sup>ε</sup>-Bis[3-(*N*-decanoyl)aminopropanoyl]-*N*'-[2-(benzyloxycarbonyl)ethyl]-L-lysine (**50**): yield 0.420 g (57.1 %); m.p. 148-152 °C; FT-IR (KBr): /cm<sup>-1</sup> 3308, 3298, 3082, 2958, 2924, 2856, 1738, 1642 and 1553; <sup>1</sup>H-NMR (CDCl<sub>3</sub>): δ 0.81-0.90 (t, 6H, CH<sub>3</sub> × 2), 1.16-1.38 (m, 26H, CH<sub>3</sub>(CH<sub>2</sub>)<sub>6</sub> × 2, \*CHCH<sub>2</sub>CH<sub>2</sub>), 1.46-1.65 (m, 8H, CH<sub>3</sub>(CH<sub>2</sub>)<sub>6</sub>CH<sub>2</sub> × 2, \*CHCH<sub>2</sub>CH<sub>2</sub>CH<sub>2</sub>), 2.13-2.22 (t, 4H, CH<sub>3</sub>(CH<sub>2</sub>)<sub>7</sub>CH<sub>2</sub> × 2), 2.40-2.55 (m, 4H, NHCH<sub>2</sub>CH<sub>2</sub>C(=O) × 2), 2.59-2.79 (m, 2H, NHCH<sub>2</sub>CH<sub>2</sub>C(=O)), 3.05-3.13 (q, 2H, \*CH(CH<sub>2</sub>)<sub>3</sub>CH<sub>2</sub>), 3.40-3.58 (m, 6H, NHCH<sub>2</sub>CH<sub>2</sub>C(=O) × 3), 5.10-5.16 (s, 2H, CH<sub>2</sub>C<sub>6</sub>H<sub>5</sub>), 7.28-7.39 (m, 5H, C<sub>6</sub>H<sub>5</sub>). **14**, yield 0.175 g (53.7 %); m.p. 160-162 °C; FT-IR (KBr): /cm<sup>-1</sup> 3304, 3086, 2958, 2924, 2856, 1719, 1640 and 1557; <sup>1</sup>H-NMR (CDCl<sub>3</sub>): δ 0.80-0.93 (t, 6H, CH<sub>3</sub> × 2), 1.15-1.69 (m, 34H, CH<sub>3</sub>(CH<sub>2</sub>)<sub>7</sub> × 2, \*CH(CH<sub>2</sub>)<sub>3</sub>), 2.11-2.24 (m, 4H, CH<sub>3</sub>(CH<sub>2</sub>)<sub>7</sub>CH<sub>2</sub> × 2), 2.36-2.62 (m, 6H, NHCH<sub>2</sub>CH<sub>2</sub>C(=O) × 3), 3.04-3.12 (q, 2H, \*CH(CH<sub>2</sub>)<sub>3</sub>CH<sub>2</sub>), 3.41-3.63 (m, 6H, NHCH<sub>2</sub>CH<sub>2</sub>C(=O) × 3), 4.45-4.53 (m, 1H, \*CH), 6.24-6.34 (m, 1H, NH), 6.49-6.67 (m, 1H, NH), 6.71-6.92 (m, 1H, NH), 6.92-7.09 (m, 1H, NH), 7.13-7.24 (m, 1H, NH); (Found: C, 62.50; H, 9.87; N, 9.50. Calc. for C<sub>35</sub>H<sub>65</sub>N<sub>5</sub>O<sub>7</sub>·0.3H<sub>2</sub>O: C, 62.50; H, 9.82; N, 10.41 %).

*N*<sup>α</sup>,*N*<sup>ε</sup>-bis[3-(*N*-octanoyl)aminopropanoyl]-*N*'-[2-(2-carboxy)ethyl]-L-lysine (**15**). The compound **15** related to **13** was prepared as described above using octanoic acid

instead of dodecanic acid. *N*-octanoyl- $\beta$ -alanine benzyl ester (**51**): yield 18.36 g (86.7 %); m.p. 56-57 °C; FT-IR (KBr): /cm<sup>-1</sup> 3310, 2958, 2932, 2920, 2874, 2856, 1738, 1723, 1640, 1551, 1195, 737 and 698; <sup>1</sup>H-NMR (CDCl<sub>3</sub>):  $\delta$  0.78-0.99 (t, 3H, CH<sub>3</sub>), 1.14-1.41 (m, 8H, CH<sub>3</sub>(CH<sub>2</sub>)<sub>4</sub>), 1.49-1.69 (m, 2H, CH<sub>3</sub>(CH<sub>2</sub>)<sub>4</sub>CH<sub>2</sub>), 2.04-2.19 (t, 2H, CH<sub>3</sub>(CH<sub>2</sub>)<sub>4</sub>CH<sub>2</sub>), 2.52-2.66 (t, 2H, CH<sub>2</sub>C(=O)O), 3.44-3.60 (m, 2H, NHCH<sub>2</sub>), 5.06-5.22 (s, 2H, CH<sub>2</sub>C<sub>6</sub>H<sub>5</sub>), 5.92-6.16 (s, 1H, NH), 7.27-7.47 (m, 5H, C<sub>6</sub>H<sub>5</sub>). *N*-octanoyl- $\beta$ -alanine (**52**): yield 9.27 g (91.4 %); m.p. 102-103 °C; FT-IR (KBr): /cm<sup>-1</sup> 3302, 2958, 2924, 2874, 2856, 1696, 1640, 1547, 1466, 1441, 928 and 723; <sup>1</sup>H-NMR (CDCl<sub>3</sub>):  $\delta$  0.78-0.98 (t, 3H, CH<sub>3</sub>), 1.15-1.42 (m, 8H, CH<sub>3</sub>(CH<sub>2</sub>)<sub>4</sub>), 1.51-1.72 (m, 2H, CH<sub>3</sub>(CH<sub>2</sub>)<sub>4</sub>CH<sub>2</sub>), 2.10-2.26 (t, 2H, CH<sub>3</sub>(CH<sub>2</sub>)<sub>4</sub>CH<sub>2</sub>), 2.50-2.68 (t, 2H, CH<sub>2</sub>C(=O)O), 3.44-3.61 (m, 2H, NHCH<sub>2</sub>), 6.34-6.54 (m, 1H, NH), 9.94 (br, 1H, OH). *N* <sup>$\alpha$</sup> ,*N* <sup>$\epsilon$</sup> -bis[3-(*N*-octanoyl)aminopropanoyl]-L-lysine benzyl ester (**53**): yield 6.10 g (80.3 %); m.p. 157-159 °C; FT-IR (KBr): /cm<sup>-1</sup> 3302, 2958, 2926, 2856, 1742, 1640, 1549, 1460 and 698; <sup>1</sup>H-NMR (CDCl<sub>3</sub>):  $\delta$  0.74-0.99 (m, 6H, CH<sub>3</sub> × 2), 1.13-1.42 (m, 18H, CH<sub>3</sub>(CH<sub>2</sub>)<sub>4</sub> × 2, \*CHCH<sub>2</sub>CH<sub>2</sub>), 1.42-1.52 (m, 2H, \*CH(CH<sub>2</sub>)<sub>2</sub>CH<sub>2</sub>), 1.52-1.68 (m, 4H, CH<sub>3</sub>(CH<sub>2</sub>)<sub>4</sub>CH<sub>2</sub> × 2), 1.68-1.92 (m, 2H, \*CHCH<sub>2</sub>), 2.07-2.31 (m, 4H, CH<sub>3</sub>(CH<sub>2</sub>)<sub>5</sub>CH<sub>2</sub> × 2), 2.35-2.61 (m, 4H, NHCH<sub>2</sub>CH<sub>2</sub>C(=O) × 2), 3.03-3.18 (m, 2H, \*CH(CH<sub>2</sub>)<sub>3</sub>CH<sub>2</sub>), 3.40-3.63 (m, 4H, NHCH<sub>2</sub>CH<sub>2</sub>C(=O) × 2), 4.43-4.59 (m, 1H, \*CH), 5.07-5.27 (m, 2H, CH<sub>2</sub>C<sub>6</sub>H<sub>5</sub>), 6.56-6.69 (t, 1H, NH), 6.78-6.89 (t, 1H, NH), 6.89-7.00 (t, 1H, NH), 7.00-7.12 (d, 1H, NH), 7.28-7.46 (m, 5H, C<sub>6</sub>H<sub>5</sub>). *N* <sup>$\alpha$</sup> ,*N* <sup>$\epsilon$</sup> -bis[3-(*N*-octanoyl)aminopropanoyl]-L-lysine (**54**): yield 4.35 g (89.7 %); m.p. 167-169 °C; FT-IR (KBr): /cm<sup>-1</sup> 3306, 2958, 2928, 2856, 1717, 1642, 1557, 1458, 1379 and 721; <sup>1</sup>H-NMR (CDCl<sub>3</sub>):  $\delta$  0.81-0.97 (t, 6H, CH<sub>3</sub> × 2), 1.18-1.39 (m, 18H, CH<sub>3</sub>(CH<sub>2</sub>)<sub>4</sub> × 2, \*CHCH<sub>2</sub>CH<sub>2</sub>), 1.39-1.90 (m, 8H, \*CHCH<sub>2</sub>CH<sub>2</sub>CH<sub>2</sub>, CH<sub>3</sub>(CH<sub>2</sub>)<sub>4</sub>CH<sub>2</sub> × 2), 2.07-2.24 (m, 4H, CH<sub>3</sub>(CH<sub>2</sub>)<sub>5</sub>CH<sub>2</sub> × 2), 2.37-2.56 (m, 4H, NHCH<sub>2</sub>CH<sub>2</sub>C(=O) × 2), 2.86-2.98 (m, 2H, \*CH(CH<sub>2</sub>)<sub>3</sub>CH<sub>2</sub>), 3.40-3.61 (m, 4H, NHCH<sub>2</sub>CH<sub>2</sub>C(=O) × 2), 4.09-4.23 (m, 1H, \*CH), 5.95-6.17 (m, 1H, NH), 6.56-6.69 (m, 1H, NH), 6.69-6.90 (m, 1H, NH), 6.90-7.03 (m, 1H, NH). *N* <sup>$\alpha$</sup> ,*N* <sup>$\epsilon$</sup> -bis[3-(*N*-octanoyl)aminopropanoyl]-*N*'-[2-(benzyloxycarbonyl)ethyl]-L-lysineamide (**55**): yield 2.37 g (79.3 %); m.p. 176-180 °C; FT-

IR (KBr):  $\text{/cm}^{-1}$  3302, 2958, 2926, 2856, 1740, 1638, 1555, 1458, 1381 and 698;  $^1\text{H-NMR}$  ( $\text{CDCl}_3$ )  $\delta$  0.77-0.96 (t, 6H,  $\text{CH}_3 \times 2$ ), 1.15-1.41 (m, 18H,  $\text{CH}_3(\text{CH}_2)_4 \times 2$ ,  $^*\text{CHCH}_2\text{CH}_2$ ), 1.41-1.53 (m, 2H,  $^*\text{CH}(\text{CH}_2)_2\text{CH}_2$ ), 1.53-1.71 (m, 4H,  $\text{CH}_3(\text{CH}_2)_4\text{CH}_2 \times 2$ ), 1.71-1.88 (m, 2H,  $^*\text{CHCH}_2$ ), 2.09-2.28 (t, 4H,  $\text{CH}_3(\text{CH}_2)_5\text{CH}_2 \times 2$ ), 2.37-2.53 (m, 4H,  $\text{NHCH}_2\text{CH}_2\text{C}(=\text{O})\text{NH} \times 2$ ), 2.53-2.66 (t, 2H,  $\text{CH}_2\text{C}(=\text{O})\text{O}$ ), 3.10-3.23 (m, 2H,  $^*\text{CH}(\text{CH}_2)_3\text{CH}_2$ ), 3.39-3.67 (m, 6H,  $\text{NHCH}_2\text{CH}_2\text{C}(=\text{O}) \times 3$ ), 4.20-4.30 (m, 1H,  $^*\text{CH}$ ), 5.11-5.20 (s, 2H,  $\text{CH}_2\text{C}_6\text{H}_5$ ), 6.34-6.47 (m, 1H,  $\text{NH}$ ), 6.61-6.72 (m, 1H,  $\text{NH}$ ), 6.72-6.87 (m, 2H,  $\text{NH} \times 2$ ), 6.87-7.00 (m, 1H,  $\text{NH}$ ), 7.29-7.46 (m, 5H,  $\text{C}_6\text{H}_5$ ). **15**, yield 1.28 g (67.4 %); m.p. 171-173 °C; FT-IR (KBr):  $\text{/cm}^{-1}$  3306, 2958, 2928, 2856, 1716, 1638, 1557, 1468, 1456, 1381 and 719;  $^1\text{H-NMR}$  ( $\text{CDCl}_3$ ):  $\delta$  0.76-0.98 (m, 6H,  $\text{CH}_3 \times 2$ ), 1.06-1.47 (m, 20H,  $\text{CH}_3(\text{CH}_2)_4 \times 2$ ,  $^*\text{CHCH}_2(\text{CH}_2)_2$ ), 1.49-1.70 (m, 4H,  $\text{CH}_3(\text{CH}_2)_4\text{CH}_2 \times 2$ ), 1.70-1.93 (m, 2H,  $^*\text{CHCH}_2$ ), 2.07-2.30 (m, 4H,  $\text{CH}_3(\text{CH}_2)_5\text{CH}_2 \times 2$ ), 2.34-2.57 (m, 4H,  $\text{NHCH}_2\text{CH}_2\text{C}(=\text{O})\text{NH} \times 2$ ), 2.57-2.76 (m, 2H,  $\text{CH}_2\text{C}(=\text{O})\text{O}$ ), 2.76-2.91 (m, 2H,  $^*\text{CH}(\text{CH}_2)_3\text{CH}_2$ ), 3.42-3.69 (m, 6H,  $\text{NHCH}_2\text{CH}_2\text{C}(=\text{O}) \times 3$ ), 4.19-4.32 (m, 1H,  $^*\text{CH}$ ), 6.67-6.88 (m, 2H,  $\text{NH} \times 2$ ), 6.88-7.00 (m, 1H,  $\text{NH}$ ), 7.69-8.12 (m, 1H,  $\text{NH}$ ), 8.12-8.27 (m, 1H,  $\text{NH}$ ); (Found: C, 57.37; H, 9.47; N, 11.13. Calc. for  $\text{C}_{31}\text{H}_{57}\text{N}_5\text{O}_7 \cdot 2.1\text{H}_2\text{O}$ : C, 57.37; H, 9.49; N, 10.79 %).

**$N^\alpha, N^\epsilon$ -Didodecanoyl- $N$ -(2-carboxy)ethyl-L-lysineamide (16)**. L-Lysine benzyl ester bis(*p*-toluenesulfonate)<sup>2a</sup> (3.00 g, 5.17 mmol) and triethylamine (2.99 g, 15.6 mmol) was dissolved in 100  $\text{cm}^3$  of THF and stirred with cooling to 0 °C. A 20  $\text{cm}^3$  portion of THF containing dodecanoyl chloride (2.49 g, 11.4 mmol) was added dropwise to the solution and stirred in an ice bath for 30 min. After being stirred for 1 day at room temperature, the solution was concentrated *in vacuo* and the residue was dissolved in 250  $\text{cm}^3$  of chloroform. The solution was washed with 5 wt% aqueous  $\text{NaHCO}_3$  (200  $\text{cm}^3$ , in twice), deionized water (20  $\text{cm}^3$ , once), 0.3 N HCl (200  $\text{cm}^3$ , in twice), and deionized water (20  $\text{cm}^3$ , once). The solution was dried over  $\text{Na}_2\text{SO}_4$ . After filtration, the filtrate was concentrated *in vacuo* and recrystallized from methanol to give white solid  $N^\alpha, N^\epsilon$ -didodecanoyl-L-lysine benzyl ester (**56**): yield 2.50 g (80.6 %); m.p. 101-105 °C; FT-IR

(KBr):  $\text{/cm}^{-1}$  3322, 2958, 2924, 2854, 1723, 1642, 1545 and 1468;  $^1\text{H-NMR}$  ( $\text{CDCl}_3$ ):  $\delta$  0.80-1.00 (t, 6H,  $\text{CH}_3 \times 2$ ), 1.17-1.43 (m, 34H,  $\text{CH}_3(\text{CH}_2)_8 \times 2$ ,  $^*\text{CHCH}_2\text{CH}_2$ ), 1.43-1.55 (m, 2H,  $^*\text{CH}(\text{CH}_2)_2\text{CH}_2$ ), 1.55-1.78 (m, 4H,  $\text{CH}_3(\text{CH}_2)_8\text{CH}_2 \times 2$ ), 1.78-1.92 (m, 2H,  $^*\text{CHCH}_2$ ), 2.09-2.32 (m, 4H,  $\text{CH}_2\text{C}(=\text{O}) \times 2$ ), 3.12-3.28 (m, 2H,  $\text{NHCH}_2$ ), 4.56-4.71 (m, 1H,  $^*\text{CH}$ ), 5.09-5.26 (m, 2H,  $\text{CH}_2\text{C}_6\text{H}_5$ ), 5.62-5.76 (m, 1H,  $\text{NH}$ ), 6.17-6.30 (d, 1H,  $\text{NH}$ ), 7.28-7.47 (m, 5H,  $\text{C}_6\text{H}_5$ ). **56** (2.29 g, 3.81 mmol) was dissolved in 200  $\text{cm}^3$  of THF with heating and Pd black (1 g) was added to the solution.  $\text{H}_2$  gas was bubbled slowly into the solution for 7 hours. After confirming the removal of benzyl group by FTIR measurement, Pd black was removed by filtration. The filtrate was concentrated *in vacuo* and the residue was recrystallized from methanol to give white solid  $N^\alpha, N^\epsilon$ -didodecanoyl-L-lysine (**57**): yield 1.75 g (89.7 %); m.p. 118-122  $^\circ\text{C}$ ; FT-IR (KBr):  $\text{/cm}^{-1}$  3310, 2958, 2920, 2854, 1715, 1647, 1557, 1470 and 719;  $^1\text{H-NMR}$  ( $\text{CDCl}_3$ )  $\delta$  0.79-0.95 (t, 6H,  $\text{CH}_3 \times 2$ ), 1.16-1.44 (m, 34H,  $\text{CH}_3(\text{CH}_2)_8 \times 2$ ,  $^*\text{CHCH}_2\text{CH}_2$ ), 1.47-1.69 (m, 6H,  $\text{CH}_3(\text{CH}_2)_8\text{CH}_2 \times 2$ ,  $^*\text{CH}(\text{CH}_2)_2\text{CH}_2$ ), 1.72-1.97 (m, 2H,  $^*\text{CHCH}_2$ ), 2.13-2.31 (m, 4H,  $\text{CH}_2\text{C}(=\text{O}) \times 2$ ), 3.11-3.42 (m, 2H,  $\text{NHCH}_2$ ), 4.50-4.60 (m, 1H,  $^*\text{CH}$ ), 6.04-6.16 (t, 1H,  $\text{NH}$ ), 6.76-6.85 (d, 1H,  $\text{NH}$ ), 7.95 (br, 1H,  $\text{OH}$ ). **57** (1.00 g, 1.96 mmol),  $\beta$ -alanine benzyl ester *p*-toluenesulfonate<sup>2a</sup> (1.03 g, 2.94 mmol), and triethylamine (0.816 g, 8.06 mmol) was dissolved in 100  $\text{cm}^3$  of THF and stirred with cooling to 0  $^\circ\text{C}$ . DEPC (0.546 g, 3.35 mmol) was added to the mixture and stirred in an ice bath for 30 min. After being stirred for 1 day at room temperature, the solution was concentrated *in vacuo* and the residue was dissolved in 250  $\text{cm}^3$  of chloroform. The solution was washed with 5 wt% aqueous  $\text{NaHCO}_3$  (200  $\text{cm}^3$ , in twice), deionized water (20  $\text{cm}^3$ , once), 0.3 N HCl (200  $\text{cm}^3$ , in twice), and deionized water (20  $\text{cm}^3$ , once). The solution was dried over  $\text{Na}_2\text{SO}_4$ . After filtration, the filtrate was concentrated *in vacuo* and recrystallized from methanol to give white solid  $N^\alpha, N^\epsilon$ -didodecanoyl-*N*-[2-(benzyloxycarbonyl)ethyl]-L-lysine (**58**): yield 1.18 g (89.4 %); m.p. 119-127  $^\circ\text{C}$ ; FT-IR (KBr):  $\text{/cm}^{-1}$  3318, 2958, 2920, 2852, 1740, 1642, 1557, 1470, 1458, 1390, 719 and 698;  $^1\text{H-NMR}$  ( $\text{CDCl}_3$ ):  $\delta$  0.82-0.96 (t, 6H,  $\text{CH}_3 \times 2$ ), 1.12-1.40

(m, 34H, CH<sub>3</sub>(CH<sub>2</sub>)<sub>8</sub> × 2, \*CHCH<sub>2</sub>CH<sub>2</sub>), 1.43-1.53 (m, 2H, \*CH(CH<sub>2</sub>)<sub>2</sub>CH<sub>2</sub>), 1.53-1.70 (m, 4H, CH<sub>3</sub>(CH<sub>2</sub>)<sub>8</sub>CH<sub>2</sub> × 2), 1.74-1.87 (m, 2H, \*CHCH<sub>2</sub>), 2.10-2.39 (m, 4H, CH<sub>3</sub>(CH<sub>2</sub>)<sub>9</sub>CH<sub>2</sub> × 2), 2.52-2.66 (t, 2H, CH<sub>2</sub>C(=O)O), 3.11-3.31 (m, 2H, \*CH(CH<sub>2</sub>)<sub>3</sub>CH<sub>2</sub>), 3.42-3.63 (m, 2H, CH<sub>2</sub>CH<sub>2</sub>C(=O)O), 4.29-4.40 (m 1H \*CH), 5.08-5.23 (s, 2H, CH<sub>2</sub>C<sub>6</sub>H<sub>5</sub>), 5.83-5.97 (t, 1H, NH), 6.43-6.55 (d, 1H, NH), 6.88-7.00 (t, 1H, NH), 7.29-7.49 (m, 5H, C<sub>6</sub>H<sub>5</sub>). **58** (1.06 g, 1.58 mmol) was dissolved in 200 cm<sup>3</sup> of THF with heating and Pd black (1 g) was added to the solution. H<sub>2</sub> gas was bubbled slowly into the solution for 6 hours. After confirming the removal of benzyl group by FTIR measurement, Pd black was removed by filtration. The filtrate was concentrated *in vacuo* and the residue was recrystallized from methanol to give white solid (**16**): yield 0.740 g (80.6 %); m.p. 131-134 °C; FT-IR (KBr): /cm<sup>-1</sup> 3316, 2958, 2820, 2854, 1717, 1644, 1560, 1470 and 719; <sup>1</sup>H-NMR (CDCl<sub>3</sub>): δ 0.76-0.97 (t, 6H, CH<sub>3</sub> × 2), 1.07-1.41 (m, 34H, CH<sub>3</sub>(CH<sub>2</sub>)<sub>8</sub> × 2, \*CHCH<sub>2</sub>CH<sub>2</sub>), 1.46-1.53 (m, 2H, \*CH(CH<sub>2</sub>)<sub>2</sub>CH<sub>2</sub>), 1.53-1.69 (m, 4H, CH<sub>3</sub>(CH<sub>2</sub>)<sub>8</sub>CH<sub>2</sub> × 2), 1.69-1.88 (m, 2H, \*CHCH<sub>2</sub>), 2.09-2.30 (m, 4H, CH<sub>3</sub>(CH<sub>2</sub>)<sub>9</sub>CH<sub>2</sub> × 2), 2.47-2.69 (m, 2H, CH<sub>2</sub>C(=O)O), 3.01-3.33 (m, 2H, \*CH(CH<sub>2</sub>)<sub>3</sub>CH<sub>2</sub>), 3.37-3.71 (m, 2H, CH<sub>2</sub>CH<sub>2</sub>C(=O)O), 4.45-4.62 (m, 1H, \*CH), 6.01-6.32 (m, 1H, NH), 6.70-6.94 (m, 1H, NH), 7.31-7.55 (m, 1H, NH); (Found: C, 65.45; H, 10.43; N, 7.06. Calc. for C<sub>33</sub>H<sub>63</sub>N<sub>3</sub>O<sub>5</sub>·1.3H<sub>2</sub>O: C, 65.45; H, 10.92; N, 6.94 %).

## References

- 1 H. Ihara, H. Hachisako, C. Hirayama and K. Yamada, *Liq. Cryst.*, 1987, **2**, 215-221.
- 2 (a) H. Hachisako, Y. Murata and H. Ihara, *J. Chem. Soc., Perkin Trans. 2*, 1999, 2569-2577; (b) H. Hachisako, T. Yamazaki, H. Ihara, C. Hirayama and K. Yamada, *J. Chem. Soc., Perkin Trans. 2*, 1994, 1671-1680; (c) H. Hachisako, T. Yamazaki, H. Ihara, C. Hirayama and K. Yamada, *J. Chem. Soc., Perkin Trans. 2*, 1994, 1681-1690.
