# Supplementary material for: Molecular structural requirements, dye specificity, and application of anionic peptide amphiphiles that induce intense fluorescence in cationic dyes
Source: Royal Society of Chemistry journal article supplement (doi:10.1039/b818206j), 2009-01-01
Supplement: b818206j-b.pdf [file b818206j-b.pdf]

**Table S1** UV-visible absorption and fluorescence spectral data of DBASt-4C<sub>1</sub>, St-2C<sub>1</sub>, and St-2C<sub>2</sub> in the presence of various peptide amphiphiles in water; 20 °C, pH 10, [dye] = 0.15 mM, [amphiphile] = 3.0 mM.

| Dye                         | Amphiphile                  | UV-visible absorption spectral data <sup>c</sup> |                      |                          | Fluorescence spectral data <sup>d</sup> |                           |                        |
|-----------------------------|-----------------------------|--------------------------------------------------|----------------------|--------------------------|-----------------------------------------|---------------------------|------------------------|
|                             |                             | $\lambda_{\max}$ /nm                             | Absorbance           | Dye species <sup>a</sup> | $\lambda_{\text{ex}}$ /nm               | $\lambda_{\text{em}}$ /nm | Intensity <sup>f</sup> |
| DBASt-4C <sub>1</sub>       | <b>1</b>                    | (477) <sup>b</sup>                               | (0.402) <sup>b</sup> | M <sub>n</sub>           | 584                                     | 614                       | 224                    |
|                             |                             | 520                                              | 0.426                | M <sub>i</sub>           |                                         |                           |                        |
|                             | <b>2</b>                    | 464                                              | 0.367                | H                        | 554                                     | 609                       | 40.7                   |
|                             | <b>3</b>                    | 498                                              | 0.719                | M <sub>i</sub>           | 570                                     | 609                       | 163                    |
|                             | <b>4</b>                    | 465                                              | 0.453                | H                        | 530                                     | 574                       | 22.1                   |
|                             | <b>5</b>                    | 481                                              | 0.537                | M <sub>n</sub>           | 577                                     | 612                       | 376                    |
|                             |                             | (541) <sup>b</sup>                               | (0.267) <sup>b</sup> | M <sub>i</sub>           |                                         |                           |                        |
|                             | <b>7</b>                    | 474                                              | 0.441                | M <sub>n</sub>           | 557                                     | 607                       | 76.3                   |
|                             | <b>10</b>                   | 541                                              | 0.754                | M <sub>i</sub>           | 590                                     | 612                       | 314                    |
|                             | <b>11</b>                   | (468) <sup>b</sup>                               | (0.401) <sup>b</sup> | M <sub>n</sub>           | 585                                     | 611                       | 323                    |
|                             |                             | 532                                              | 0.553                | M <sub>i</sub>           |                                         |                           |                        |
|                             | <b>13</b>                   | 472                                              | 0.454                | M <sub>n</sub>           | 571                                     | 608                       | 211                    |
|                             |                             | (532)                                            | (0.260) <sup>b</sup> | M <sub>i</sub>           |                                         |                           |                        |
|                             | None (in water)             | 477                                              | 0.502                | M <sub>d</sub>           | 547                                     | 601                       | 2.0                    |
| None (in MeOH) <sup>e</sup> | 490                         | 0.729                                            | M <sub>d</sub>       | 558                      | 600                                     | 7.9                       |                        |
| St-2C <sub>1</sub>          | <b>1</b>                    | 500                                              | 0.864                | M <sub>i</sub>           | 552                                     | 575                       | 406                    |
|                             | <b>2</b>                    | 491                                              | 0.713                | M <sub>i</sub>           | 544                                     | 572                       | 195                    |
|                             | <b>3</b>                    | 491                                              | 0.764                | M <sub>i</sub>           | 549                                     | 576                       | 446                    |
|                             | <b>4</b>                    | 479                                              | 0.460                | M <sub>i</sub>           | 540                                     | 573                       | 177                    |
|                             | <b>5</b>                    | 504                                              | 0.859                | M <sub>i</sub>           | 555                                     | 576                       | 520                    |
|                             | <b>7</b>                    | 496                                              | 0.712                | M <sub>i</sub>           | 549                                     | 575                       | 402                    |
|                             | <b>10</b>                   | 516                                              | 0.887                | M <sub>i</sub>           | 559                                     | 578                       | 605                    |
|                             | <b>11</b>                   | 510                                              | 0.773                | M <sub>i</sub>           | 556                                     | 576                       | 447                    |
|                             | <b>13</b>                   | 505                                              | 0.824                | M <sub>i</sub>           | 554                                     | 579                       | 375                    |
|                             | None (in water)             | 437                                              | 0.401                | M <sub>d</sub>           | 513                                     | 567                       | 1.3                    |
|                             | None (in MeOH) <sup>e</sup> | 460                                              | 0.590                | M <sub>d</sub>           | 517                                     | 569                       | 3.4                    |
| St-2C <sub>2</sub>          | <b>1</b>                    | 500                                              | 0.787                | M <sub>i</sub>           | 551                                     | 574                       | 367                    |
|                             | <b>2</b>                    | 490                                              | 0.602                | M <sub>i</sub>           | 544                                     | 574                       | 166                    |
|                             | <b>3</b>                    | 492                                              | 0.732                | M <sub>i</sub>           | 549                                     | 576                       | 404                    |
|                             | <b>4</b>                    | 481                                              | 0.381                | M <sub>i</sub>           | 537                                     | 572                       | 175                    |
|                             | <b>5</b>                    | 507                                              | 0.873                | M <sub>i</sub>           | 554                                     | 576                       | 684                    |
|                             | <b>7</b>                    | 474                                              | 0.602                | M <sub>i</sub>           | 540                                     | 572                       | 209                    |
|                             | <b>10</b>                   | 514                                              | 0.861                | M <sub>i</sub>           | 556                                     | 576                       | 621                    |
|                             | <b>11</b>                   | 526                                              | 0.800                | M <sub>i</sub>           | 554                                     | 575                       | 544                    |
|                             | <b>13</b>                   | 506                                              | 0.751                | M <sub>i</sub>           | 554                                     | 577                       | 317                    |
|                             | None (in water)             | 434                                              | 0.360                | M <sub>d</sub>           | 504                                     | 566                       | 1.0                    |
|                             | None (in MeOH) <sup>e</sup> | 460                                              | 0.536                | M <sub>d</sub>           | 525                                     | 570                       | 2.9                    |

<sup>a</sup> M<sub>d</sub>: molecularly dispersed monomer of dye . M<sub>i</sub>: incorporated monomer of dye. M<sub>n</sub>: monomer of dye bound to the carboxylate and not incorporated. H: H-aggregates of dye. Assignment of dye species was made according to previously reported method.<sup>3c</sup> <sup>b</sup> Shoulder. <sup>c</sup> Path length: 0.1 cm. <sup>d</sup> Path length: 1.0 cm, band width: 1.5 nm. <sup>e</sup> contains 25 vol% water (MeOH:water = 75:25 v/v). <sup>f</sup> See footnote <sup>e</sup> of Table 1.

**Table S2** UV-visible absorption and fluorescence spectral data of Qu-2C<sub>1</sub> and Qu-2C<sub>2</sub> (Quinaldine Red) in the presence of various peptide amphiphiles in water; 20 °C, pH 10, [dye] = 0.15 mM, [amphiphile] = 3.0 mM.

| Dye                         | Amphiphile      | UV-visible absorption spectral data <sup>c</sup> |                |                          | Fluorescence spectral data <sup>d</sup> |                                 |                        |
|-----------------------------|-----------------|--------------------------------------------------|----------------|--------------------------|-----------------------------------------|---------------------------------|------------------------|
|                             |                 | $\lambda_{\max}/\text{nm}$                       | Absorbance     | Dye species <sup>a</sup> | $\lambda_{\text{ex}}/\text{nm}$         | $\lambda_{\text{em}}/\text{nm}$ | Intensity <sup>f</sup> |
| Qu-2C <sub>1</sub>          | <b>1</b>        | 567                                              | 1.232          | M <sub>i</sub>           | 623                                     | 643                             | 8.0                    |
|                             | <b>2</b>        | 459                                              | 0.276          | H                        | 610                                     | 638                             | 3.5                    |
|                             |                 | 551                                              | 0.628          | M <sub>i</sub>           |                                         |                                 |                        |
|                             | <b>3</b>        | 556                                              | 1.027          | M <sub>i</sub>           | 620                                     | 641                             | 16.1                   |
|                             | <b>4</b>        | 434                                              | 0.588          | H                        | 588                                     | 630                             | 5.9                    |
|                             |                 | 531                                              | 0.192          | M <sub>i</sub>           |                                         |                                 |                        |
|                             | <b>5</b>        | 571                                              | 1.164          | M <sub>i</sub>           | 624                                     | 642                             | 26.1                   |
|                             | <b>7</b>        | 432                                              | 0.263          | H                        | 609                                     | 635                             | 16.0                   |
|                             |                 | 562                                              | 0.410          | M <sub>i</sub>           |                                         |                                 |                        |
|                             | <b>10</b>       | 582                                              | 1.412          | M <sub>i</sub>           | 632                                     | 648                             | 25.3                   |
|                             | <b>11</b>       | 581                                              | 1.100          | M <sub>i</sub>           | 630                                     | 645                             | 17.4                   |
|                             | <b>13</b>       | 571                                              | 1.027          | M <sub>i</sub>           | 621                                     | 640                             | 16.8                   |
|                             | None (in water) | 492                                              | 0.391          | M <sub>d</sub>           | 571                                     | 621                             | 0.9                    |
| None (in MeOH) <sup>e</sup> | 524             | 0.603                                            | M <sub>d</sub> | 600                      | 632                                     | 1.8                             |                        |
| Qu-2C <sub>2</sub>          | <b>1</b>        | 569                                              | 1.344          | M <sub>i</sub>           | 624                                     | 643                             | 10.4                   |
|                             | <b>2</b>        | 448                                              | 0.492          | H                        | 612                                     | 638                             | 2.7                    |
|                             |                 | 556                                              | 0.609          | M <sub>i</sub>           |                                         |                                 |                        |
|                             | <b>3</b>        | 559                                              | 1.198          | M <sub>i</sub>           | 623                                     | 643                             | 18.7                   |
|                             | <b>4</b>        | 435                                              | 0.583          | H                        | 594                                     | 631                             | 7.4                    |
|                             |                 | 553                                              | 0.264          | M <sub>i</sub>           |                                         |                                 |                        |
|                             | <b>5</b>        | 573                                              | 1.430          | M <sub>i</sub>           | 628                                     | 643                             | 32.4                   |
|                             | <b>7</b>        | 433                                              | 0.455          | H                        | 610                                     | 634                             | 20.0                   |
|                             |                 | 563                                              | 0.552          | M <sub>i</sub>           |                                         |                                 |                        |
|                             | <b>10</b>       | 581                                              | 1.469          | M <sub>i</sub>           | 630                                     | 644                             | 49.9                   |
|                             | <b>11</b>       | 579                                              | 1.425          | M <sub>i</sub>           | 629                                     | 643                             | 32.1                   |
|                             | <b>13</b>       | 579                                              | 1.425          | M <sub>i</sub>           | 626                                     | 645                             | 26.9                   |
|                             | None (in water) | 490                                              | 0.585          | M <sub>d</sub>           | 559                                     | 605                             | 1.2                    |
| None (in MeOH) <sup>e</sup> | 526             | 0.634                                            | M <sub>d</sub> | 555                      | 611                                     | 1.3                             |                        |

<sup>a</sup> M<sub>d</sub>: molecularly dispersed monomer of dye. M<sub>i</sub>: incorporated monomer of dye. M<sub>n</sub>: monomer of dye bound to the carboxylate and not incorporated. H: H-aggregates of dye. Assignment of dye species was made according to previously reported method. <sup>b</sup> Shoulder. <sup>c</sup> Path length: 0.1 cm. <sup>d</sup> Path length: 1.0 cm, band width: 1.5 nm. <sup>e</sup> contains 25 vol% water (MeOH:water = 75:25 v/v). <sup>f</sup> See footnote <sup>e</sup> of Table 1.

**Table S3** UV-visible absorption and fluorescence spectral data of MDEPAP in the presence of various peptide amphiphiles in water; 20 °C, pH 10, [dye] = 0.15 mM, [amphiphile] = 3.0 mM.

| Dye                         | Amphiphile      | UV-visible absorption spectral data <sup>c</sup> |                         |                          | Fluorescence spectral data <sup>d</sup> |                           |                        |
|-----------------------------|-----------------|--------------------------------------------------|-------------------------|--------------------------|-----------------------------------------|---------------------------|------------------------|
|                             |                 | $\lambda_{\max}$ /nm                             | Absorbance <sup>e</sup> | Dye species <sup>a</sup> | $\lambda_{\text{ex}}$ /nm               | $\lambda_{\text{em}}$ /nm | Intensity <sup>g</sup> |
| MDEPAP                      | <b>1</b>        | 592                                              | 1.251                   | M <sub>i</sub>           | -                                       | -                         | -                      |
|                             | <b>2</b>        | 585                                              | 0.985                   | M <sub>i</sub>           | -                                       | -                         | -                      |
|                             | <b>3</b>        | 587                                              | 1.219                   | M <sub>i</sub>           | -                                       | -                         | -                      |
|                             | <b>4</b>        | 562                                              | 0.745                   | M <sub>n</sub>           | -                                       | -                         | -                      |
|                             | <b>5</b>        | 597                                              | 1.394                   | M <sub>i</sub>           | -                                       | -                         | -                      |
|                             | <b>7</b>        | 579                                              | 1.094                   | M <sub>i</sub>           | -                                       | -                         | -                      |
|                             | <b>10</b>       | 605                                              | 1.229                   | M <sub>i</sub>           | -                                       | -                         | -                      |
|                             | <b>11</b>       | 599                                              | 1.204                   | M <sub>i</sub>           | -                                       | -                         | -                      |
|                             | <b>13</b>       | 598                                              | 1.230                   | M <sub>i</sub>           | -                                       | -                         | -                      |
|                             | None (in water) | 566 (20°C)                                       | 0.781                   | M <sub>d</sub>           | -                                       | -                         | -                      |
|                             |                 | 561 (60°C)                                       | 0.729                   | M <sub>d</sub>           | -                                       | -                         | -                      |
| None (in MeOH) <sup>f</sup> | 563             | 0.940                                            | M <sub>d</sub>          | -                        | -                                       | -                         |                        |

<sup>a</sup> M<sub>d</sub>: molecularly dispersed monomer of dye. M<sub>i</sub>: incorporated monomer of dye. M<sub>n</sub>: monomer of dye bound to the carboxylate and not incorporated. H: H-aggregates of dye. Assignment of dye species was made according to previously reported method. <sup>3c</sup> <sup>b</sup> Shoulder. <sup>c</sup> Path length: 0.1 cm. <sup>d</sup> Path length: 1.0 cm, band width: 1.5 nm. <sup>e</sup> The  $\lambda_{\max}$  of this dye was unfortunately insensitive to solvent polarity. However, molar absorption coefficient was sensitive to solvent polarity, that is, absorbance was increased with decreasing solvent polarity as is observed generally. <sup>f</sup> contains 25 vol% water (MeOH:water = 75:25 v/v). <sup>g</sup> See footnote <sup>e</sup> of Table 1.

**Table S4** UV-visible absorption and fluorescence spectral data of DEC in the presence of various peptide amphiphiles in water; 20 °C, pH 10, [dye] = 0.15 mM, [amphiphile] = 3.0 mM.

| Dye                         | Amphiphile         | UV-visible absorption spectral data <sup>c</sup> |                      |                          | Fluorescence spectral data <sup>d</sup> |                                 |                        |   |
|-----------------------------|--------------------|--------------------------------------------------|----------------------|--------------------------|-----------------------------------------|---------------------------------|------------------------|---|
|                             |                    | $\lambda_{\max}/\text{nm}$                       | Absorbance           | Dye species <sup>a</sup> | $\lambda_{\text{ex}}/\text{nm}$         | $\lambda_{\text{em}}/\text{nm}$ | Intensity <sup>f</sup> |   |
| DEC                         | 1                  | (461) <sup>b</sup>                               | (0.245) <sup>b</sup> | M <sub>n</sub>           | 554                                     | 574                             | 4.0                    |   |
|                             |                    | 493                                              | 0.690                |                          |                                         |                                 |                        |   |
|                             |                    | 529                                              | 1.189                |                          |                                         |                                 |                        |   |
|                             | 2                  | 443                                              | 0.452                | H                        | 568                                     | 596                             | 2.6                    |   |
|                             |                    | 491                                              | 0.276                | M <sub>n</sub>           |                                         |                                 |                        |   |
|                             |                    | 529                                              | 0.345                |                          |                                         |                                 |                        |   |
|                             | 3                  | (459) <sup>b</sup>                               | (0.232) <sup>b</sup> | M <sub>n</sub>           | 549                                     | 576                             | 1.3                    |   |
|                             |                    | 492                                              | 0.623                |                          |                                         |                                 |                        |   |
|                             |                    | 526                                              | 1.006                |                          |                                         |                                 |                        |   |
|                             | 4                  | (458) <sup>b</sup>                               | (0.054) <sup>b</sup> | M <sub>n</sub>           | 569                                     | 590                             | 140                    |   |
|                             |                    | (491) <sup>b</sup>                               | (0.157) <sup>b</sup> |                          |                                         |                                 |                        |   |
|                             |                    | 527                                              | 0.251                |                          |                                         |                                 |                        |   |
|                             |                    | 556                                              | 0.181                |                          |                                         |                                 |                        | J |
|                             |                    | 582                                              | 0.401                |                          |                                         |                                 |                        | J |
|                             | 5                  | (456) <sup>b</sup>                               | (0.286) <sup>b</sup> | M <sub>i</sub>           | 553                                     | 571                             | 7.6                    |   |
|                             |                    | 491                                              | 0.763                |                          |                                         |                                 |                        |   |
|                             |                    | 527                                              | 1.365                |                          |                                         |                                 |                        |   |
|                             | 7                  | (458) <sup>b</sup>                               | (0.157) <sup>b</sup> | M <sub>n</sub>           | 566                                     | 591                             | 96.3                   |   |
|                             |                    | 491                                              | 0.423                |                          |                                         |                                 |                        |   |
|                             |                    | 525                                              | 0.690                |                          |                                         |                                 |                        |   |
|                             |                    | 556                                              | 0.315                |                          |                                         |                                 |                        | J |
|                             |                    | 580                                              | 1.010                |                          |                                         |                                 |                        | J |
|                             | 10                 | 460                                              | 0.238                | M <sub>i</sub>           | 549                                     | 563                             | 84.7                   |   |
|                             |                    | 492                                              | 0.682                |                          |                                         |                                 |                        |   |
|                             |                    | 530                                              | 1.614                |                          |                                         |                                 |                        |   |
|                             | 11                 | 460                                              | 0.227                | M <sub>i</sub>           | 549                                     | 563                             | 42.8                   |   |
|                             |                    | 491                                              | 0.672                |                          |                                         |                                 |                        |   |
|                             |                    | 530                                              | 1.597                |                          |                                         |                                 |                        |   |
| 13                          | 459 <sup>b</sup>   | 0.195 <sup>b</sup>                               | M <sub>n</sub>       | 552                      | 567                                     | 4.6                             |                        |   |
|                             | 493                | 0.477                                            |                      |                          |                                         |                                 |                        |   |
|                             | 532                | 0.965                                            |                      |                          |                                         |                                 |                        |   |
| None (in water)             | (456) <sup>b</sup> | (0.204) <sup>b</sup>                             | M <sub>d</sub>       | 553                      | 575                                     | 1.3                             |                        |   |
|                             | 489                | 0.537                                            |                      |                          |                                         |                                 |                        |   |
|                             | 523                | 0.712                                            |                      |                          |                                         |                                 |                        |   |
| None (in MeOH) <sup>e</sup> | 578                | 0.0261                                           | J                    | 559                      | 573                                     | 1.3                             |                        |   |
|                             | (457) <sup>b</sup> | (0.243) <sup>b</sup>                             | M <sub>d</sub>       |                          |                                         |                                 |                        |   |
|                             | 490                | 0.702                                            |                      |                          |                                         |                                 |                        |   |
|                             |                    | 523                                              | 1.044                |                          |                                         |                                 |                        |   |

<sup>a</sup> M<sub>d</sub>: molecularly dispersed monomer of dye. M<sub>i</sub>: incorporated monomer of dye. M<sub>n</sub>: monomer of dye bound to the carboxylate and not incorporated. J: J-aggregates of dye: J-aggregation is a result of non-incorporation of less planar dyes. H: H-aggregates of dye. Assignment of dye species was made according to previously reported method.<sup>3c</sup> <sup>b</sup> Shoulder. <sup>c</sup> Path length: 0.1 cm. <sup>d</sup> Path length: 1.0 cm, band width: 1.5 nm. <sup>e</sup> contains 25 vol% water (MeOH:water = 75:25 v/v). <sup>f</sup> See footnote *e* of Table 1.

**Table S5** UV-visible absorption and fluorescence spectral data of DECC in the presence of various peptide amphiphiles in water; 20 °C, pH 10, [dye] = 0.15 mM, [amphiphile] = 3.0 mM.

| Dye                         | Amphiphile         | UV-visible absorption spectral data <sup>c</sup> |                      |                          | Fluorescence spectral data <sup>d</sup> |                           |                        |
|-----------------------------|--------------------|--------------------------------------------------|----------------------|--------------------------|-----------------------------------------|---------------------------|------------------------|
|                             |                    | $\lambda_{\max}$ /nm                             | Absorbance           | Dye species <sup>a</sup> | $\lambda_{\text{ex}}$ /nm               | $\lambda_{\text{em}}$ /nm | Intensity <sup>f</sup> |
| DECC                        | 1                  | 532                                              | 0.349                | $M_i$                    | 655                                     | 664                       | 8.0                    |
|                             |                    | 577                                              | 0.662                |                          |                                         |                           |                        |
|                             |                    | 629                                              | 1.591                |                          |                                         |                           |                        |
|                             | 2                  | 521                                              | 0.544                | H                        | 632                                     | 645                       | 1.7                    |
|                             |                    | (569) <sup>b</sup>                               | (0.331) <sup>b</sup> | H                        |                                         |                           |                        |
|                             |                    | 612                                              | 0.208                | $M_n$                    |                                         |                           |                        |
|                             | 3                  | 476                                              | 0.699                | H                        | 618                                     | 654                       | 11.6                   |
|                             |                    | 572                                              | 0.266                | $M_i$                    |                                         |                           |                        |
|                             |                    | 618                                              | 0.423                |                          |                                         |                           |                        |
|                             | 4                  | 503                                              | 0.380                | H                        | 633                                     | 642                       | 16.5                   |
|                             |                    | (570) <sup>b</sup>                               | (0.192) <sup>b</sup> | H                        |                                         |                           |                        |
|                             |                    | 611                                              | 0.162                | $M_i$                    |                                         |                           |                        |
|                             | 5                  | (532) <sup>b</sup>                               | (0.181) <sup>b</sup> | $M_i$                    | 666                                     | 673                       | 45.0                   |
|                             |                    | 583                                              | 0.735                |                          |                                         |                           |                        |
|                             |                    | 637                                              | 2.020                |                          |                                         |                           |                        |
|                             | 7                  | 507                                              | 0.348                | H                        | 641                                     | 648                       | 26.8                   |
|                             |                    | 563                                              | 0.245                | H                        |                                         |                           |                        |
|                             |                    | 612                                              | 0.283                | $M_i$                    |                                         |                           |                        |
|                             | 10                 | (534) <sup>b</sup>                               | (0.164) <sup>b</sup> | $M_i$                    | 666                                     | 673                       | 61.1                   |
|                             |                    | 586                                              | 0.786                |                          |                                         |                           |                        |
|                             |                    | 637                                              | 2.120                |                          |                                         |                           |                        |
| 11                          | (530) <sup>b</sup> | (0.123) <sup>b</sup>                             | $M_i$                | 663                      | 669                                     | 62.0                      |                        |
|                             | 584                | 0.613                                            |                      |                          |                                         |                           |                        |
|                             | 636                | 2.047                                            |                      |                          |                                         |                           |                        |
| None (in water)             | 523                | 0.455                                            | H                    | 588                      | 627                                     | 1.4                       |                        |
|                             | 544                | 0.483                                            | H                    |                          |                                         |                           |                        |
|                             | 599                | 0.262                                            | $M_d$                |                          |                                         |                           |                        |
| None (in MeOH) <sup>e</sup> | (520) <sup>b</sup> | (0.248) <sup>b</sup>                             | $M_d$                | 638                      | 648                                     | 1.3                       |                        |
|                             | 561                | 0.998                                            |                      |                          |                                         |                           |                        |
|                             | 603                | 1.932                                            |                      |                          |                                         |                           |                        |

<sup>a</sup>  $M_d$ : molecularly dispersed monomer of dye.  $M_i$ : incorporated monomer of dye.  $M_n$ : monomer of dye bound to the carboxylate and not incorporated. J: J-aggregates of dye: J-aggregation is a result of non-incorporation of less planar dyes. H: H-aggregates of dye. Assignment of dye species was made according to previously reported method.<sup>3c</sup> <sup>b</sup> Shoulder. <sup>c</sup> Path length: 0.1 cm. <sup>d</sup> Path length: 1.0 cm, band width: 1.5 nm. <sup>e</sup> contains 25 vol% water (MeOH:water = 75:25 v/v). <sup>f</sup> See footnote <sup>e</sup> of Table 1.

**Table S6** UV-visible absorption and fluorescence spectral data of DETCC in the presence of various peptide amphiphiles in water; 20 °C, pH 10, [dye] = 0.15 mM, [amphiphile] = 3.0 mM.

| Dye                         | Amphiphile         | UV-visible absorption spectral data <sup>c</sup> |                      |                          | Fluorescence spectral data <sup>d</sup> |                                 |                        |
|-----------------------------|--------------------|--------------------------------------------------|----------------------|--------------------------|-----------------------------------------|---------------------------------|------------------------|
|                             |                    | $\lambda_{\max}/\text{nm}$                       | Absorbance           | Dye species <sup>a</sup> | $\lambda_{\text{ex}}/\text{nm}$         | $\lambda_{\text{em}}/\text{nm}$ | Intensity <sup>f</sup> |
| DETCC                       | <b>1</b>           | 542                                              | 0.652                | $M_i$                    | 601                                     | 607                             | 202                    |
|                             |                    | 581                                              | 1.814                |                          |                                         |                                 |                        |
|                             | <b>2</b>           | (471) <sup>b</sup>                               | (0.245) <sup>b</sup> | H                        | 588                                     | 631                             | 5.0                    |
|                             |                    | (536) <sup>b</sup>                               | (0.433) <sup>b</sup> | H                        |                                         |                                 |                        |
|                             |                    | 573                                              | 0.524                | $M_n$                    |                                         |                                 |                        |
|                             | <b>3</b>           | (539) <sup>b</sup>                               | (0.862) <sup>b</sup> | $M_i$                    | 601                                     | 607                             | 268                    |
|                             |                    | 574                                              | 1.489                |                          |                                         |                                 |                        |
|                             | <b>4</b>           | 476                                              | 0.345                | H                        | 580                                     | 592                             | 13.1                   |
|                             |                    | 560                                              | 0.576                | $M_n$                    |                                         |                                 |                        |
|                             | <b>5</b>           | (541) <sup>b</sup>                               | (0.613) <sup>b</sup> | $M_i$                    | 604                                     | 609                             | 444                    |
|                             |                    | 582                                              | 1.748                |                          |                                         |                                 |                        |
|                             | <b>7</b>           | (470) <sup>b</sup>                               | (0.359) <sup>b</sup> | H                        | 594                                     | 602                             | 46.7                   |
|                             |                    | (523) <sup>b</sup>                               | (0.568) <sup>b</sup> | H                        |                                         |                                 |                        |
|                             |                    | 563                                              | 0.814                | $M_i$                    |                                         |                                 |                        |
|                             | <b>10</b>          | 546                                              | 0.540                | $M_i$                    | 605                                     | 610                             | 381                    |
|                             |                    | 586                                              | 1.835                |                          |                                         |                                 |                        |
|                             | <b>11</b>          | 545                                              | 0.537                | $M_i$                    | 603                                     | 609                             | 559                    |
|                             |                    | 584                                              | 1.846                |                          |                                         |                                 |                        |
|                             | None (in water)    | 509                                              | 0.495                | H                        | 570                                     | 577                             | 19.8                   |
|                             |                    | 553                                              | 0.501                | $M_d$                    |                                         |                                 |                        |
| None (in MeOH) <sup>e</sup> | (523) <sup>b</sup> | (0.605) <sup>b</sup>                             | $M_d$                | 578                      | 584                                     | 34.8                            |                        |
|                             | 557                | 1.345                                            |                      |                          |                                         |                                 |                        |

<sup>a</sup>  $M_d$ : molecularly dispersed monomer of dye.  $M_i$ : incorporated monomer of dye.  $M_n$ : monomer of dye bound to the carboxylate and not incorporated. H: H-aggregates of dye. Assignment of dye species was made according to previously reported method. <sup>b</sup> Shoulder. <sup>c</sup> Path length: 0.1 cm. <sup>d</sup> Path length: 1.0 cm, band width: 1.5 nm. <sup>e</sup> contains 25 vol% water (MeOH:water = 75:25 v/v). <sup>f</sup> See footnote <sup>e</sup> of Table 1.

**Table S7** UV-visible absorption and fluorescence spectral data of DPTCC in the presence of various peptide amphiphiles in water; 20 °C, pH 10, [dye] = 0.15 mM, [amphiphile] = 3.0 mM.

| Dye                         | Amphiphile         | UV-visible absorption spectral data <sup>c</sup> |                      |                          | Fluorescence spectral data <sup>d</sup> |                                 |                        |
|-----------------------------|--------------------|--------------------------------------------------|----------------------|--------------------------|-----------------------------------------|---------------------------------|------------------------|
|                             |                    | $\lambda_{\max}/\text{nm}$                       | Absorbance           | Dye species <sup>a</sup> | $\lambda_{\text{ex}}/\text{nm}$         | $\lambda_{\text{em}}/\text{nm}$ | Intensity <sup>f</sup> |
| DPTCC                       | <b>1</b>           | 543                                              | 0.655                | $M_i$                    | 603                                     | 609                             | 151                    |
|                             |                    | 582                                              | 1.795                |                          |                                         |                                 |                        |
|                             | <b>2</b>           | 536                                              | 0.474                | $M_n, M_i$               | 596                                     | 606                             | 11.1                   |
|                             |                    | 577                                              | 0.698                |                          |                                         |                                 |                        |
|                             | <b>3</b>           | (538) <sup>b</sup>                               | (0.611) <sup>b</sup> | $M_i$                    | 601                                     | 608                             | 298                    |
|                             |                    | 576                                              | 1.286                |                          |                                         |                                 |                        |
|                             | <b>4</b>           | 470                                              | 0.509                | H                        | 585                                     | 635                             | 4.1                    |
|                             |                    | 570                                              | 0.774                | $M_n$                    |                                         |                                 |                        |
|                             | <b>5</b>           | (543) <sup>b</sup>                               | (0.720) <sup>b</sup> | $M_i$                    | 608                                     | 613                             | 370                    |
|                             |                    | 568                                              | 0.262                |                          |                                         |                                 |                        |
|                             | <b>7</b>           | (528) <sup>b</sup>                               | (0.480) <sup>b</sup> | $M_n, M_i$               | 594                                     | 603                             | 13.0                   |
|                             |                    | 566                                              | 1.000                |                          |                                         |                                 |                        |
|                             | <b>10</b>          | 549                                              | 0.980                | $M_i$                    | 613                                     | 621                             | 64.8                   |
|                             |                    | 584                                              | 2.097                |                          |                                         |                                 |                        |
|                             | <b>11</b>          | (546) <sup>b</sup>                               | (0.725) <sup>b</sup> | $M_i$                    | 609                                     | 615                             | 95.8                   |
|                             |                    | 587                                              | 1.960                |                          |                                         |                                 |                        |
|                             | <b>13</b>          | (534) <sup>b</sup>                               | (0.265) <sup>b</sup> | $M_i$                    | 540                                     | 601                             | 85.5                   |
|                             |                    | 584                                              | 0.495                |                          |                                         |                                 |                        |
|                             | None (in water)    | 514                                              | 0.164                | H                        | 565                                     | 573                             | 53.9                   |
|                             |                    | 555                                              | 0.241                | $M_d$                    |                                         |                                 |                        |
| None (in MeOH) <sup>e</sup> | (524) <sup>b</sup> | (0.581) <sup>b</sup>                             | $M_d$                | 583                      | 589                                     | 35.7                            |                        |
|                             | 559                | 1.317                                            |                      |                          |                                         |                                 |                        |

<sup>a</sup>  $M_d$ : molecularly dispersed monomer of dye.  $M_i$ : incorporated monomer of dye.  $M_n$ : monomer of dye bound to the carboxylate and not incorporated. H: H-aggregates of dye. Assignment of dye species was made according to previously reported method.<sup>3c</sup> <sup>b</sup> Shoulder. <sup>c</sup> Path length: 0.1 cm. <sup>d</sup> Path length: 1.0 cm, band width: 1.5 nm. <sup>e</sup> contains 25 vol% water (MeOH:water = 75:25 v/v). <sup>f</sup> See footnote *e* of Table 1.

**Table S8** UV-visible absorption and fluorescence spectral data of DE9MTCC in the presence of various peptide amphiphiles in water; 20 °C, pH 10, [dye] = 0.15 mM, [amphiphile] = 3.0 mM.

| Dye                         | Amphiphile         | UV-visible absorption spectral data <sup>c</sup> |                      |                          | Fluorescence spectral data <sup>d</sup> |                                 |                        |
|-----------------------------|--------------------|--------------------------------------------------|----------------------|--------------------------|-----------------------------------------|---------------------------------|------------------------|
|                             |                    | $\lambda_{\max}/\text{nm}$                       | Absorbance           | Dye species <sup>a</sup> | $\lambda_{\text{ex}}/\text{nm}$         | $\lambda_{\text{em}}/\text{nm}$ | Intensity <sup>f</sup> |
| DE9MTCC                     | <b>1</b>           | 531                                              | 0.733                | $M_i$                    | 591                                     | 596                             | 246                    |
|                             |                    | 567                                              | 2.009                |                          |                                         |                                 |                        |
|                             | <b>2</b>           | 526                                              | 0.824                | $M_i$                    | 589                                     | 596                             | 23.8                   |
|                             |                    | 567                                              | 1.952                |                          |                                         |                                 |                        |
|                             | <b>3</b>           | (529) <sup>b</sup>                               | (0.896) <sup>b</sup> | $M_i$                    | 590                                     | 596                             | 789                    |
|                             |                    | 562                                              | 1.733                |                          |                                         |                                 |                        |
|                             | <b>4</b>           | (499) <sup>b</sup>                               | (0.615) <sup>b</sup> | H                        | 584                                     | 591                             | 203                    |
|                             |                    | 536                                              | 1.040                | $M_i$                    |                                         |                                 |                        |
|                             | <b>5</b>           | 569                                              | 1.364                |                          | $M_i$                                   | 594                             | 600                    |
|                             |                    | (530) <sup>b</sup>                               | (0.607) <sup>b</sup> |                          |                                         |                                 |                        |
|                             | <b>7</b>           | 571                                              | 1.887                | $M_i$                    | 588                                     | 593                             | 219                    |
|                             |                    | (493) <sup>b</sup>                               | (0.392) <sup>b</sup> |                          |                                         |                                 |                        |
|                             | <b>10</b>          | 530                                              | 0.712                | $M_i$                    | 592                                     | 598                             | 482                    |
|                             |                    | 568                                              | 1.660                |                          |                                         |                                 |                        |
|                             | <b>11</b>          | 534                                              | 0.778                | $M_i$                    | 592                                     | 597                             | 696                    |
|                             |                    | 567                                              | 2.004                |                          |                                         |                                 |                        |
|                             | <b>13</b>          | 533                                              | 0.733                | $M_i$                    | 492                                     | 596                             | 178                    |
|                             |                    | 566                                              | 1.996                |                          |                                         |                                 |                        |
|                             | None (in water)    | 533                                              | 0.701                | $M_i$                    | 556                                     | 569                             | 2.4                    |
|                             |                    | 568                                              | 1.978                |                          |                                         |                                 |                        |
| None (in MeOH) <sup>e</sup> | 500                | 0.362                                            | H                    | 573                      | 583                                     | 2.2                             |                        |
|                             | 539                | 0.289                                            | $M_d$                |                          |                                         |                                 |                        |
|                             | (504) <sup>b</sup> | (0.569) <sup>b</sup>                             | $M_d$                | 573                      | 583                                     | 2.2                             |                        |
|                             | 541                | 1.635                                            |                      |                          |                                         |                                 |                        |

<sup>a</sup>  $M_d$ : molecularly dispersed monomer of dye.  $M_i$ : incorporated monomer of dye.  $M_n$ : monomer of dye bound to the carboxylate and not incorporated. J: J-aggregates of dye: J-aggregation is a result of non-incorporation of less planar dyes. H: H-aggregates of dye. Assignment of dye species was made according to previously reported method.<sup>3c</sup> <sup>b</sup> Shoulder. <sup>c</sup> Path length: 0.1 cm. <sup>d</sup> Path length: 1.0 cm, band width: 1.5 nm. <sup>e</sup> contains 25 vol% water (MeOH:water = 75:25 v/v). <sup>f</sup> See footnote <sup>e</sup> of Table 1.



**Table S9** UV-visible absorption and fluorescence spectral data of DE9ETCC (NK-737) in the presence of various peptide amphiphiles in water; 20 °C, pH 10, [dye] = 0.15 mM, [amphiphile] = 3.0 mM.

| Dye                         | Amphiphile         | UV-visible absorption spectra <sup>c</sup> |                      |                          | Fluorescence spectra <sup>d</sup> |                                 |                        |
|-----------------------------|--------------------|--------------------------------------------|----------------------|--------------------------|-----------------------------------|---------------------------------|------------------------|
|                             |                    | $\lambda_{\max}/\text{nm}$                 | Absorbance           | Dye species <sup>a</sup> | $\lambda_{\text{ex}}/\text{nm}$   | $\lambda_{\text{em}}/\text{nm}$ | Intensity <sup>f</sup> |
| DE9ETCC<br>(NK-737)         | <b>1</b>           | 533                                        | 0.772                | $M_i$                    | 594                               | 600                             | 300                    |
|                             |                    | 569                                        | 2.012                |                          |                                   |                                 |                        |
|                             | <b>2</b>           | 533                                        | 0.782                | $M_i$                    | 594                               | 600                             | 44.4                   |
|                             |                    | 569                                        | 2.016                |                          |                                   |                                 |                        |
|                             | <b>3</b>           | (530) <sup>b</sup>                         | (0.814) <sup>b</sup> | $M_i$                    | 617                               | 619                             | 306                    |
|                             |                    | 570                                        | 1.887                |                          |                                   |                                 |                        |
|                             |                    | (615) <sup>b</sup>                         | (0.112) <sup>b</sup> |                          |                                   |                                 |                        |
|                             | <b>4</b>           | (491) <sup>b</sup>                         | (0.517) <sup>b</sup> | H                        | 581                               | 588                             | 40.1                   |
|                             |                    | 566                                        | 1.084                | $M_i$                    |                                   |                                 |                        |
|                             |                    | (602) <sup>b</sup>                         | (0.254) <sup>b</sup> | J                        |                                   |                                 |                        |
|                             |                    | (638) <sup>b</sup>                         | (0.041) <sup>b</sup> | J                        |                                   |                                 |                        |
|                             | <b>5</b>           | (535) <sup>b</sup>                         | (0.814) <sup>b</sup> | $M_i$                    | 599                               | 605                             | 292                    |
|                             |                    | 574                                        | 1.942                |                          |                                   |                                 |                        |
|                             | <b>7</b>           | (491) <sup>b</sup>                         | (0.349) <sup>b</sup> | H                        | 587                               | 592                             | 49.3                   |
|                             |                    | 556                                        | 0.966                | $M_i$                    |                                   |                                 |                        |
|                             | <b>10</b>          | 537                                        | 0.742                | $M_i$                    | 597                               | 603                             | 250                    |
|                             |                    | 572                                        | 2.024                |                          |                                   |                                 |                        |
|                             | <b>11</b>          | 537                                        | 0.666                | $M_i$                    | 596                               | 602                             | 306                    |
|                             |                    | 572                                        | 2.006                |                          |                                   |                                 |                        |
|                             | <b>13</b>          | 497                                        | 0.382                | H                        | 602                               | 619                             | 55.5                   |
|                             |                    | 531 <sup>b</sup>                           | 0.449 <sup>b</sup>   | $M_i$                    |                                   |                                 |                        |
| 577                         |                    | 1.087                                      |                      |                          |                                   |                                 |                        |
| 612                         |                    | 0.462                                      | J                    |                          |                                   |                                 |                        |
| None (in water)             | 505                | 0.420                                      | H                    | 564                      | 574                               | 2.6                             |                        |
|                             | 543                | 0.334                                      | $M_d$                |                          |                                   |                                 |                        |
|                             | 630                | 0.040                                      | J                    |                          |                                   |                                 |                        |
| None (in MeOH) <sup>e</sup> | (507) <sup>b</sup> | (0.357) <sup>b</sup>                       | $M_d$                | 586                      | 598                               | 2.2                             |                        |
|                             | 546                | 1.115                                      |                      |                          |                                   |                                 |                        |

<sup>a</sup>  $M_d$ : molecularly dispersed monomer of dye.  $M_i$ : incorporated monomer of dye. J: J-aggregates of dye; J-aggregation is a result of non-incorporation of less planar dyes. H: H-aggregates of dye. Assignment of dye species was made according to previously reported method.<sup>3c</sup> <sup>b</sup> Shoulder. <sup>c</sup> Path length: 0.1 cm. <sup>d</sup> Path length: 1.0 cm, band width: 1.5 nm. <sup>e</sup> contains 25 vol% water (MeOH:water = 75:25 v/v). <sup>f</sup> See footnote <sup>e</sup> of Table 1.
