# Supplementary material for: Molecular structural requirements, dye specificity, and application of anionic peptide amphiphiles that induce intense fluorescence in cationic dyes
Source: Royal Society of Chemistry journal article supplement (doi:10.1039/b818206j), 2009-01-01
Supplement: b818206j-c.pdf [file b818206j-c.pdf]

Figure S1 Hachisako et al.

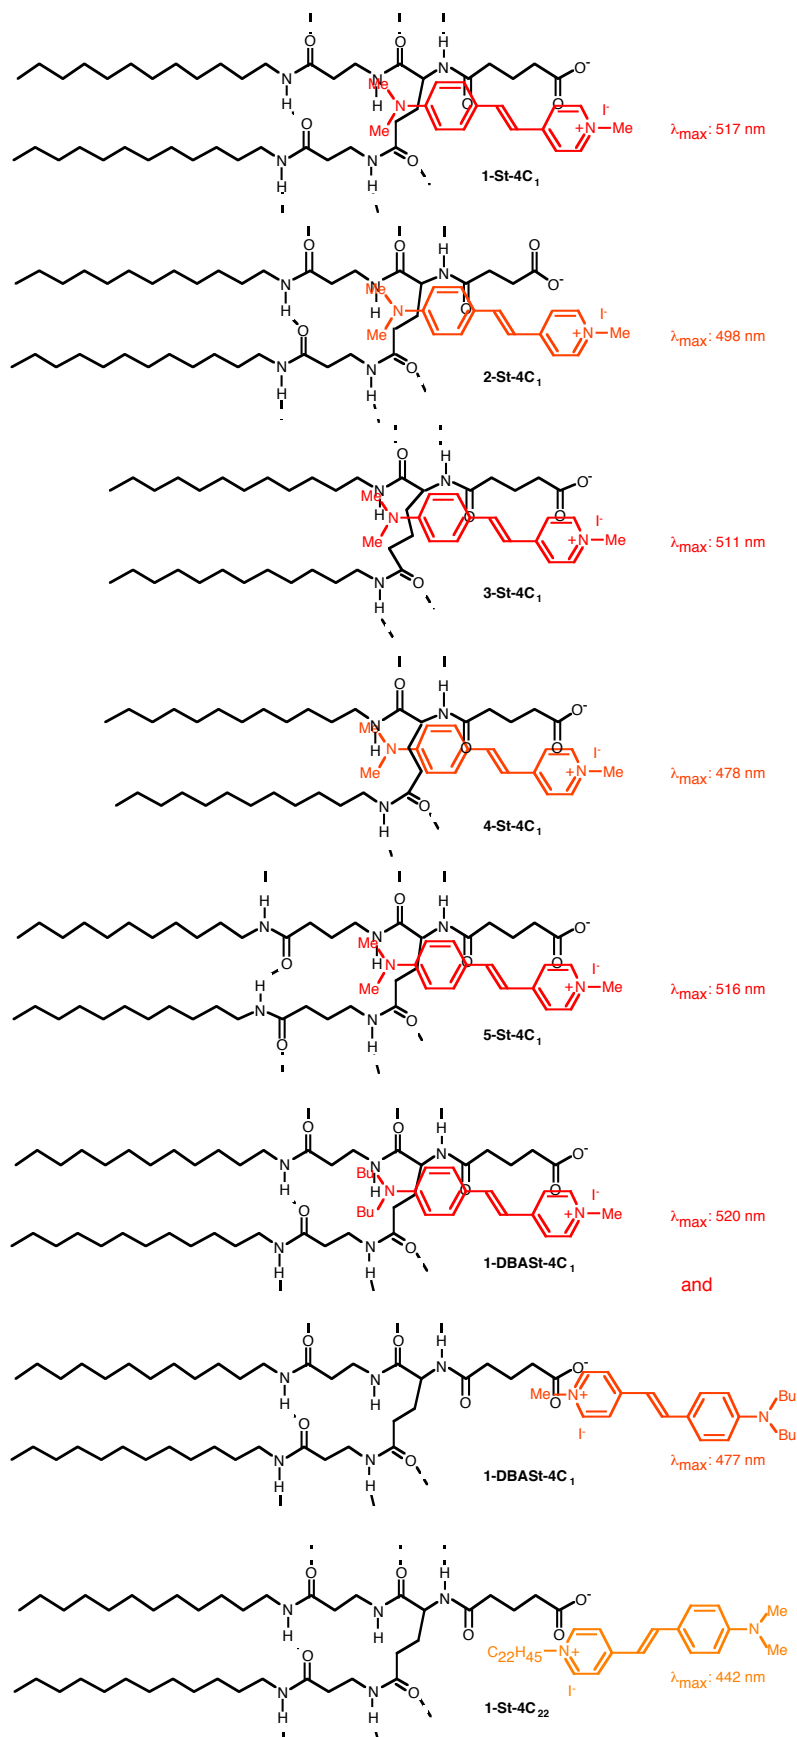

**Figure S1.** Schematic representation of probable interaction mode between anionic amphiphiles **1-5** and representative hemicyanines. It is suggested that  $\beta$ -Ala residues of **1** and GABA residues of **5** are not directly responsible for dye incorporation because electrostatically bound dyes do not reach the  $\beta$ -Ala and GABA moieties of **1** and **5**, respectively, and they rather play crucial role in adjusting packing mode between amphiphiles for formation of specific supramolecular environments (*i.e.*, width and hydrophobicity of cavities) whether they can incorporate hemicyanine dyes specifically or not.

Figure S2 Hachisako et al.

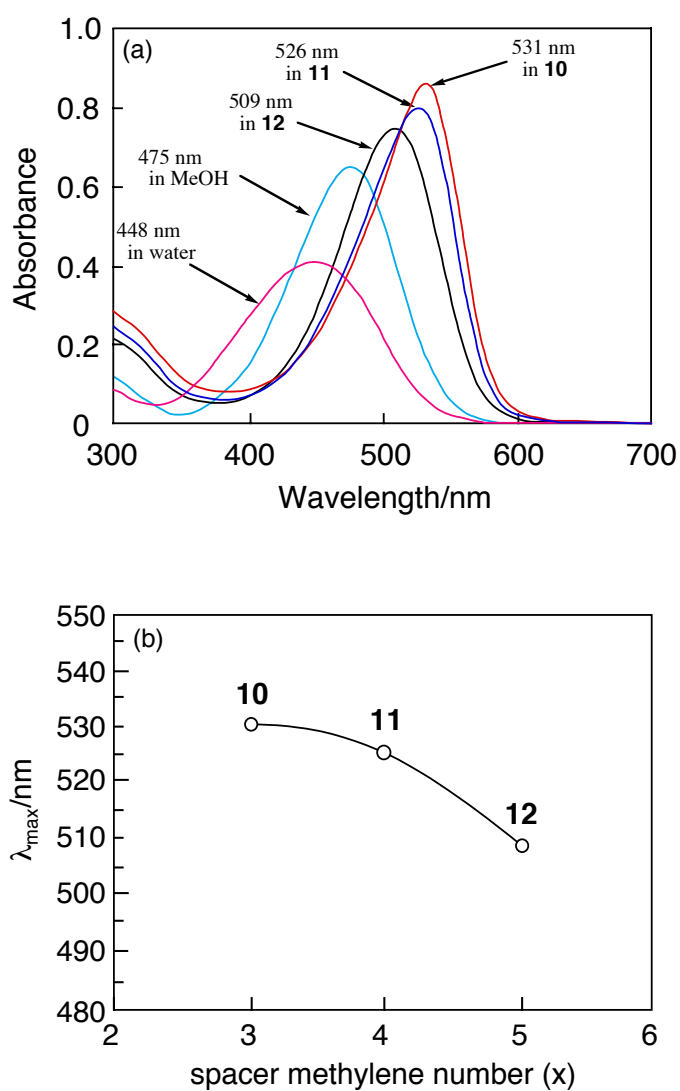

**Figure S2.** (a) UV-Vis. absorption spectra of aqueous solutions of St-4C<sub>1</sub> in the presence of **10**, **11** and **12**: temperature 20°C, pH 10, path length: 0.1 cm, [St-4C<sub>1</sub>] = 0.15 mM = const., [**10**] = [**11**] = [**12**] = 3.0 mM: (b) Relationships between  $\lambda_{\max}$  of St-4C<sub>1</sub> and spacer methylene number of L-Lys-derived amphiphiles **10**, **11** and **12**.

Figure S3 Hachisako et al.

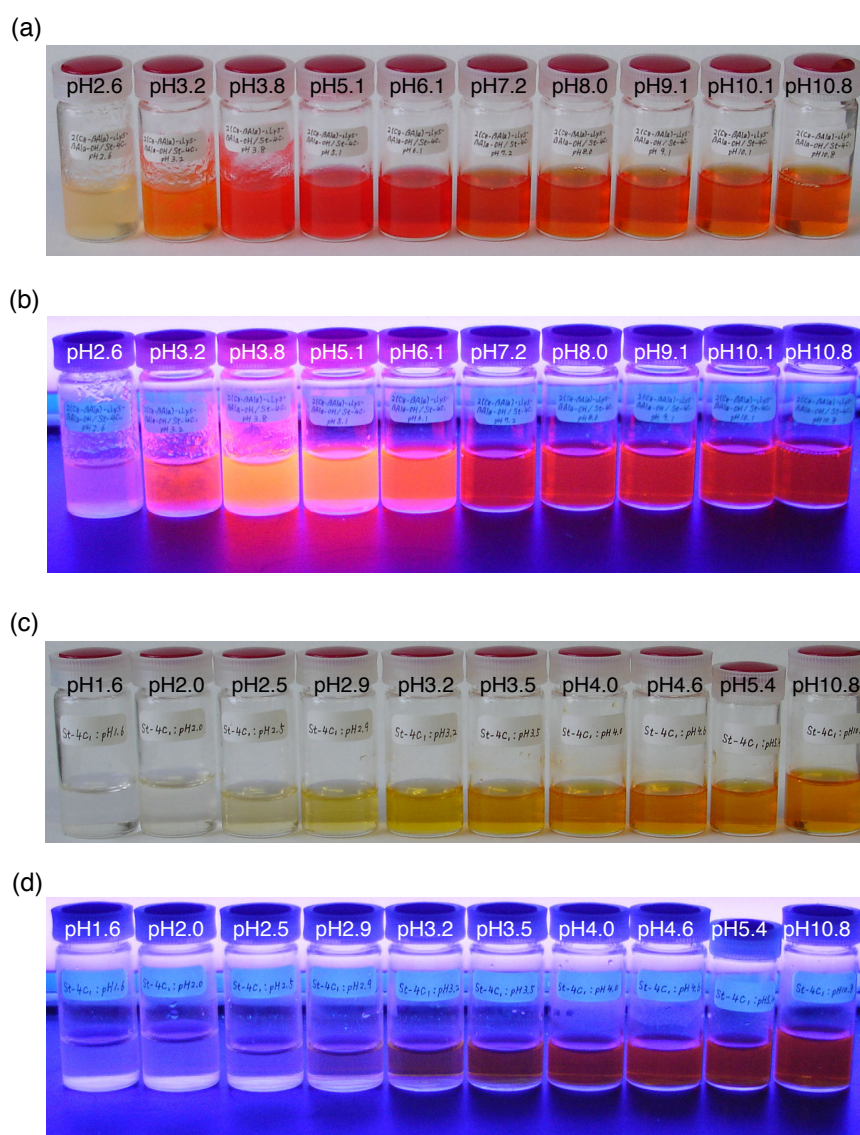

**Figure S5.** Relationships between pH and the colour of 0.15 mM of St-4C<sub>1</sub> in water in the presence of 3.0 mM of amphiphile **15**; (a) without black light irradiation; (b) under black light irradiation; (c) St-4C<sub>1</sub> alone in water without black light irradiation; (d) St-4C<sub>1</sub> alone in water under black light irradiation.

Figure S4 Hachisako et al.

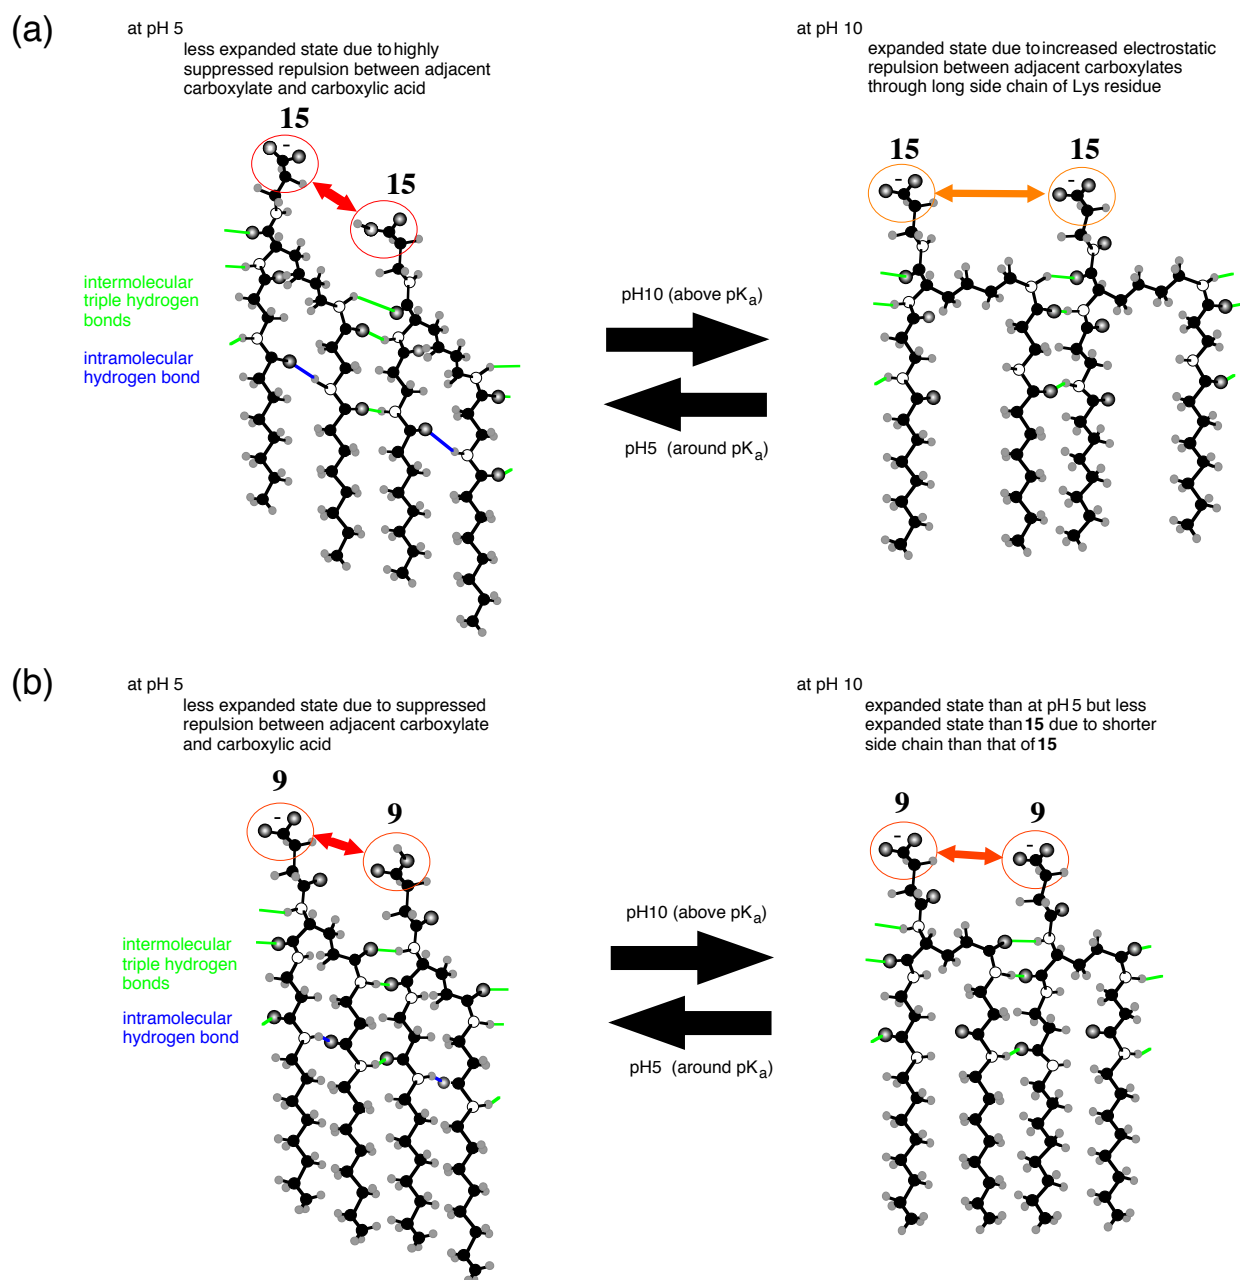

**Figure S4.** Schematic illustration of pH-dependent expansion and contraction behaviours of L-lysine-derived amphiphile **15** with long side-chain and L-glutamic acid-derived amphiphile **9** with shorter side-chain. Red and orange colours denote the pH-dependent colour change in St-4C<sub>1</sub> incorporated in self-assemblies of **15** and **9**. St-4C<sub>1</sub> electrostatically bound to carboxylate of adjacent amphiphile is omitted for clarity because of [amphiphile]/[St-4C<sub>1</sub>] = 20.

Figures S5 and S6 Hachisako et al.

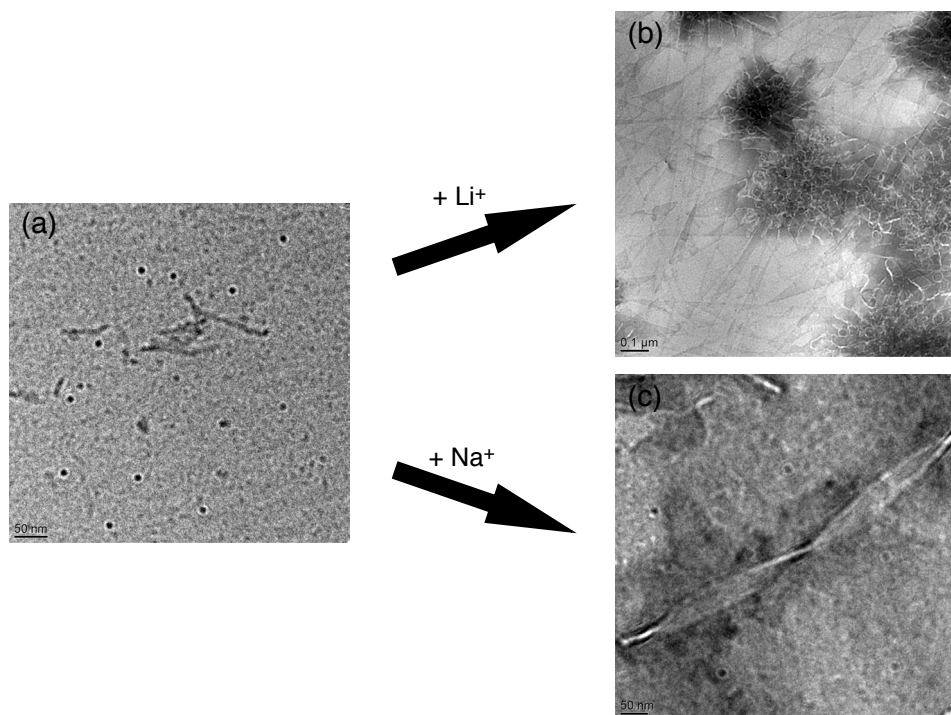

**Figure S5.** Transmission electron micrographs of peptide amphiphile **15** (a) alone in water, and after addition of (b) LiCl and (c) NaCl; pH 10, [**15**] = 3.0 mM, [LiCl] = [NaCl] = 30 mM.

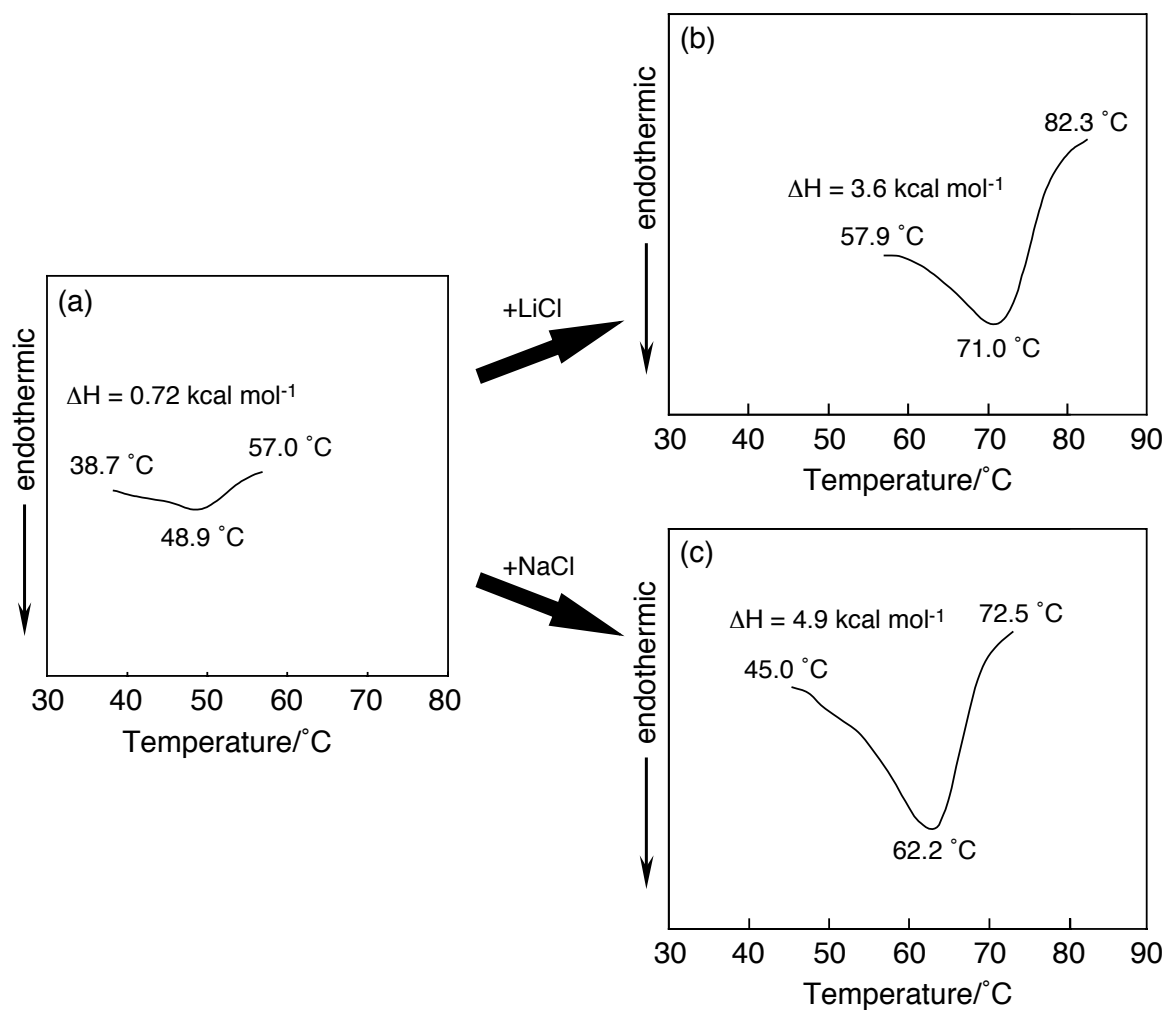

**Figure S6.** Representative DSC thermograms of peptide amphiphile **15** before (a) and after (b) addition of NaCl; pH 10, [**15**] = 20 mM, [NaCl] = 200 mM, heating rate: 2 °C/min.
